# Supplementary material
Source: PubMed Central journal article supplement (PMC5860740)
Supplement: NIHMS76456-supplement-Supplementary_Material.pdf [file NIHMS76456-supplement-Supplementary_Material.pdf]

## Supplementary Information

### Engineering protein stability with atomic precision in a monomeric miniprotein

Emily G. Baker,<sup>1\*</sup> Christopher Williams,<sup>1,2,§</sup> Kieran L. Hudson,<sup>1,†,§</sup> Gail J. Bartlett,<sup>1</sup> Jack W. Heal,<sup>1</sup> Kathryn L. Porter Goff,<sup>1</sup> Richard B. Sessions,<sup>2,3</sup> Matthew P. Crump<sup>1,2</sup> and Derek N. Woolfson<sup>1,2,3\*</sup>

<sup>1</sup>School of Chemistry, University of Bristol, Cantock's Close, Bristol, BS8 1TS, UK

<sup>2</sup>BrisSynBio, University of Bristol, Life Sciences Building, Tyndall Avenue, Bristol, BS8 1TQ, UK

<sup>3</sup>School of Biochemistry, University of Bristol, Biomedical Sciences Building, University Walk, Bristol, BS8 1TD, UK

<sup>†</sup>Current address: Department of Chemistry, University of British Columbia, 2036 Main Mall, Vancouver, British Columbia, V6T 1Z1, Canada

\*Corresponding authors: EGB ([emily.baker@bristol.ac.uk](mailto:emily.baker@bristol.ac.uk)) and DNW ([D.N.Woolfson@bristol.ac.uk](mailto:D.N.Woolfson@bristol.ac.uk))

<sup>§</sup>Contributed equally to this work.

## Supplementary Results

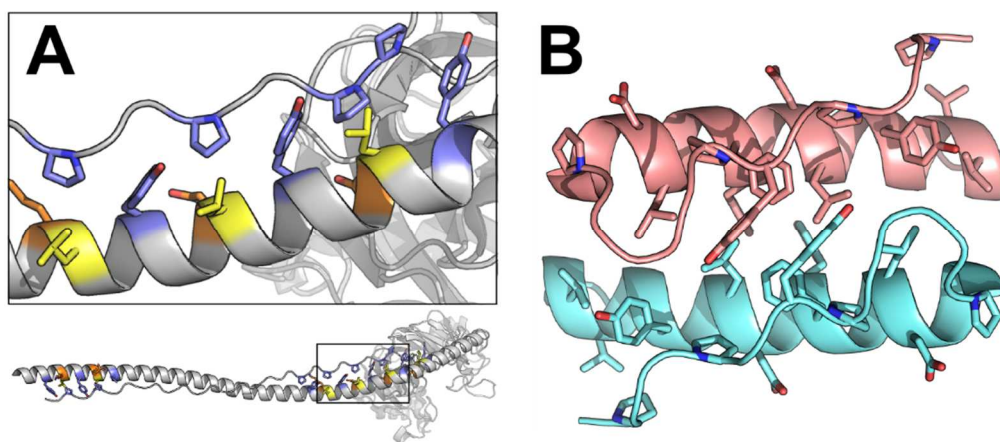

**Supplementary Figure 1: Examples of natural proteins with unusual polyproline-II-helix- $\alpha$ -helix conformation. A:** A3VP1 of Ag III of *Streptococcus mutans* (PDB: 3IOX). **B:** Avian pancreatic polypeptide of *Meleagris gallopavo* (turkey) (PDB: 2BF9).

**A** PP $\alpha$ -Tyr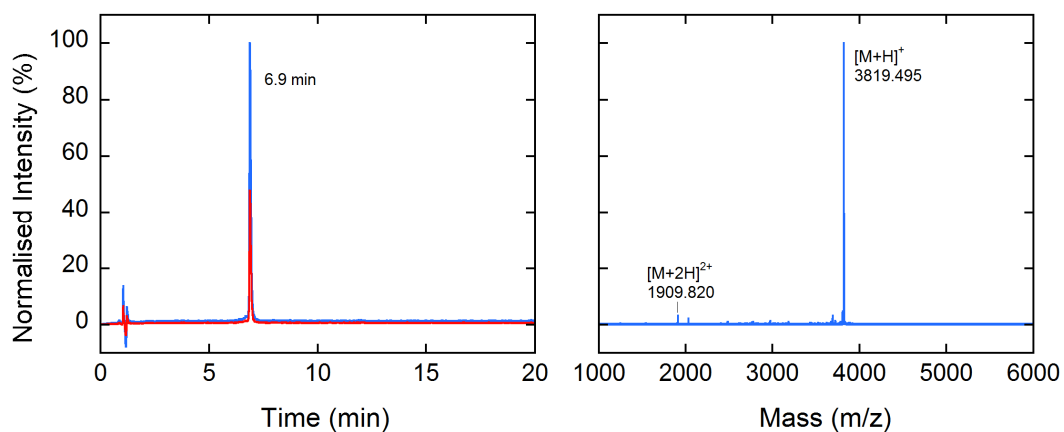**B** PP $\alpha$ -Trp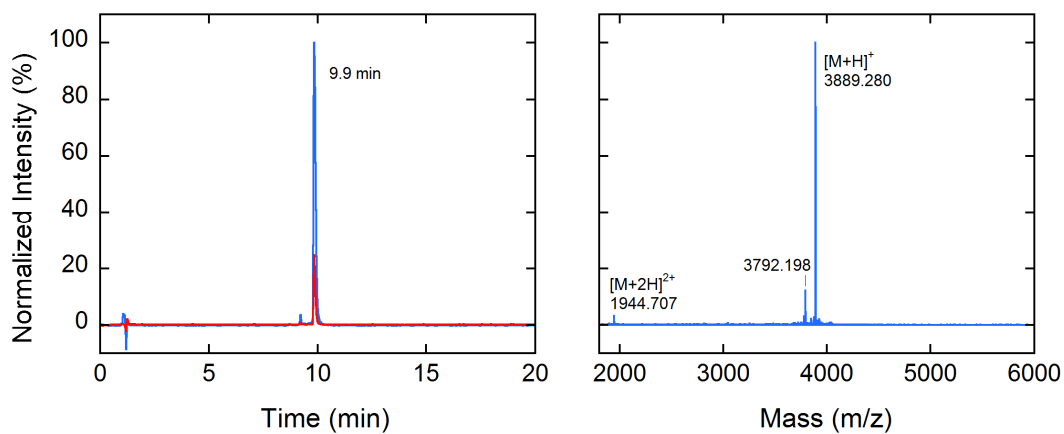**C** PP $\alpha$ -Phe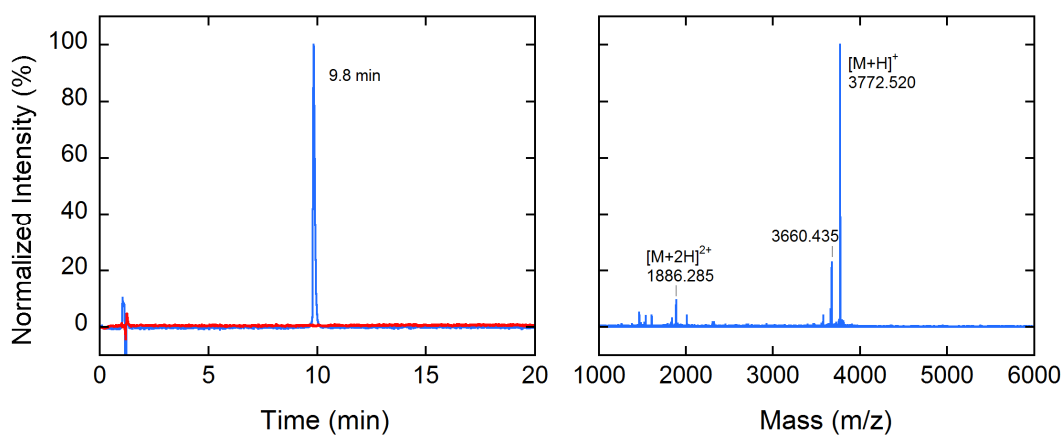

**D**  $\text{PP}\alpha\text{-}\phi\text{NH}_2$ 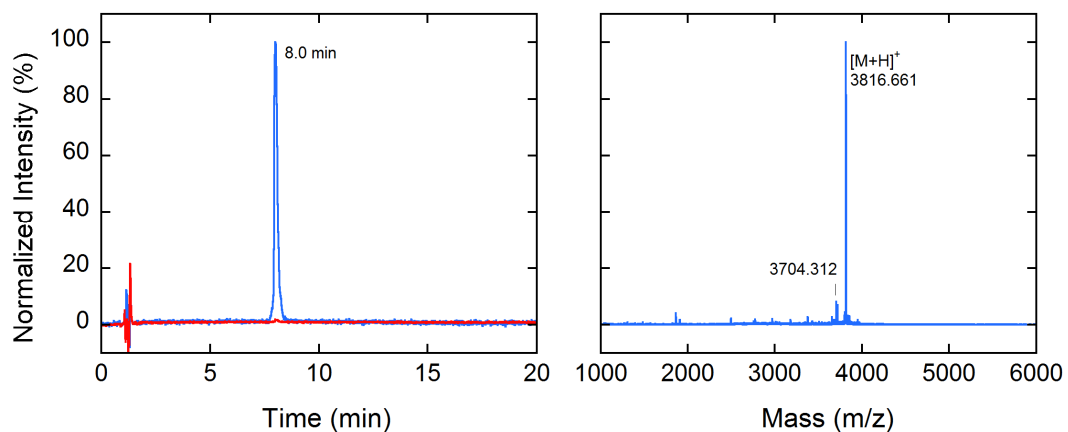**E**  $\text{PP}\alpha\text{-}\phi\text{OCH}_3$ 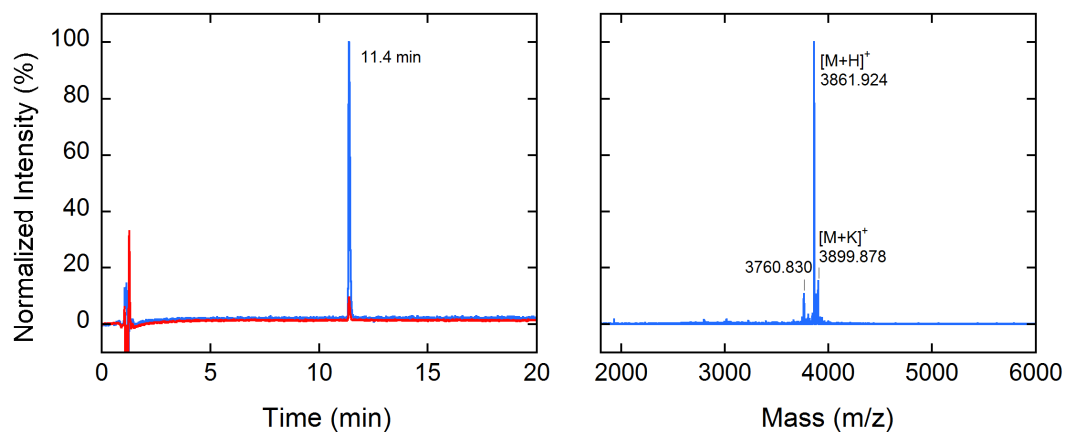**F**  $\text{PP}\alpha\text{-}\phi\text{CH}_3$ 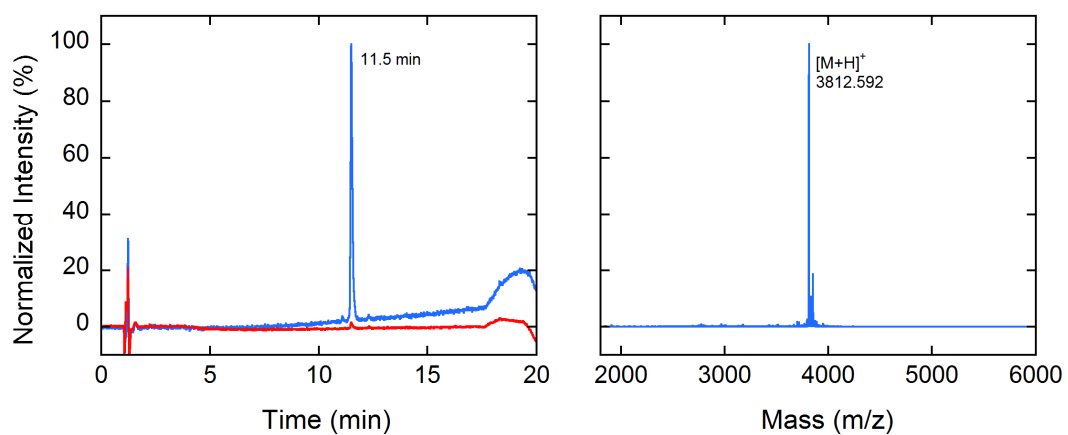

**G** PP $\alpha$ - $\phi$ F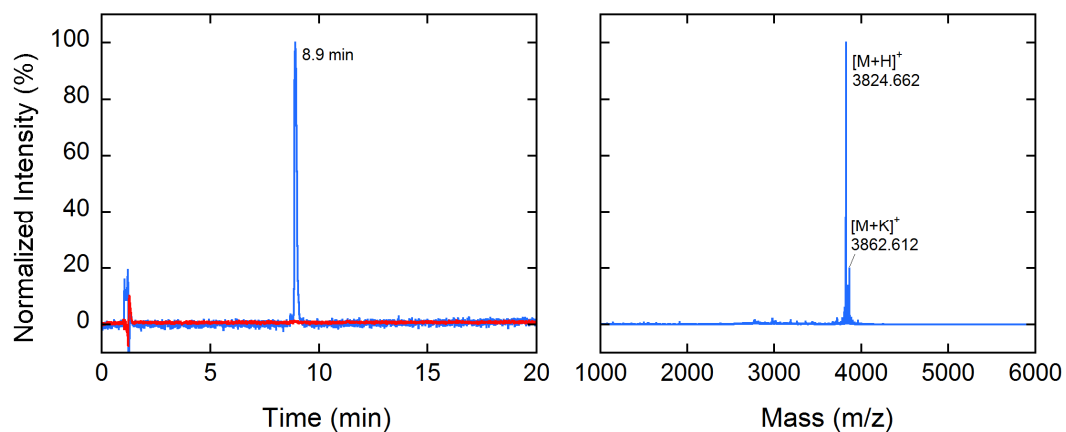**H** PP $\alpha$ - $\phi$ CN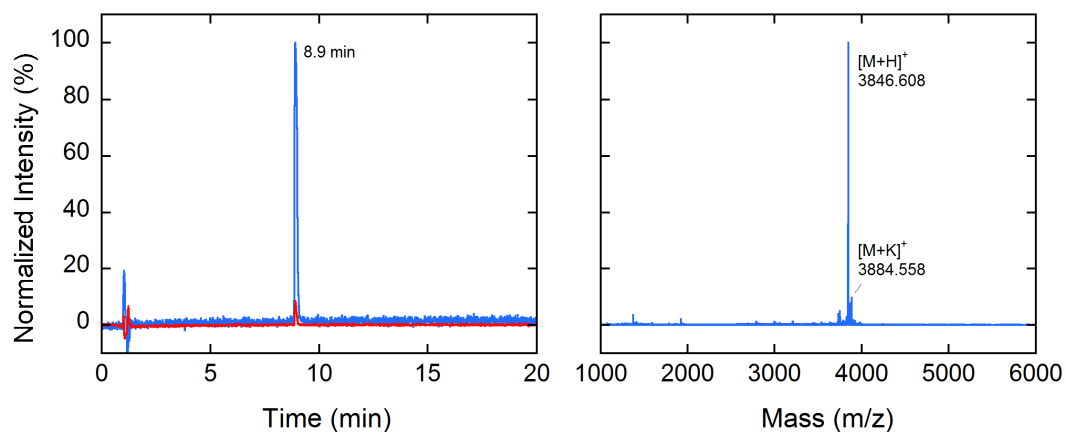**I** PP $\alpha$ - $\phi$ NO<sub>2</sub>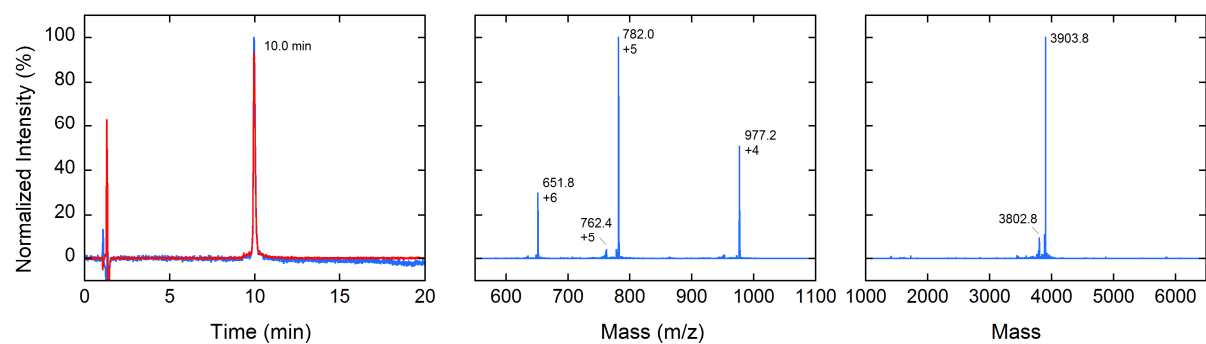

**Supplementary Figure 2: Characterizations of the peptides in this study.** A-H Analytical HPLC trace (left, monitored at 220 nm, blue and 280 nm, red) and MALDI-TOF mass spectrum (right) of **A:** PP $\alpha$ -Tyr, **B:** PP $\alpha$ -Trp, **C:** PP $\alpha$ -Phe, **D:** PP $\alpha$ - $\phi$ NH $_2$ , **E:** PP $\alpha$ - $\phi$ OCH $_3$ , **F:** PP $\alpha$ - $\phi$ CH $_3$ , **G:** PP $\alpha$ - $\phi$ F, **H:** PP $\alpha$ - $\phi$ CN, and **I:** PP $\alpha$ - $\phi$ NO $_2$ . In I the raw mass spectrum is shown centre and the deconvoluted spectrum, right. **Conditions:**

|                                 |                                                                                      |                                |                                                                                      |
|---------------------------------|--------------------------------------------------------------------------------------|--------------------------------|--------------------------------------------------------------------------------------|
| PP $\alpha$ -Tyr:               | HPLC gradient = 10-60% buffer B.<br>[M+H] <sup>+</sup> <sub>calc</sub> = 3819.282 Da | PP $\alpha$ - $\phi$ CH $_3$ : | HPLC gradient = 20-60% buffer B.<br>[M+H] <sup>+</sup> <sub>calc</sub> = 3813.365 Da |
| PP $\alpha$ -Trp:               | HPLC gradient = 10-60% buffer B.<br>[M+H] <sup>+</sup> <sub>calc</sub> = 3888.383 Da | PP $\alpha$ - $\phi$ F:        | HPLC gradient = 20-60% buffer B.<br>[M+H] <sup>+</sup> <sub>calc</sub> = 3525.254 Da |
| PP $\alpha$ -Phe:               | HPLC gradient = 10-60% buffer B.<br>[M+H] <sup>+</sup> <sub>calc</sub> = 3771.284 Da | PP $\alpha$ - $\phi$ CN:       | HPLC gradient = 20-60% buffer B.<br>[M+H] <sup>+</sup> <sub>calc</sub> = 3846.314 Da |
| PP $\alpha$ - $\phi$ NH $_2$ :  | HPLC gradient = 20-60% buffer B.<br>[M+H] <sup>+</sup> <sub>calc</sub> = 3816.329 Da | PP $\alpha$ - $\phi$ NO $_2$ : | HPLC gradient = 10-60% buffer B.<br>[M] <sub>calc</sub> = 3902.969 Da                |
| PP $\alpha$ - $\phi$ OCH $_3$ : | HPLC gradient = 10-60% buffer B.<br>[M+H] <sup>+</sup> <sub>calc</sub> = 3861.362 Da |                                |                                                                                      |

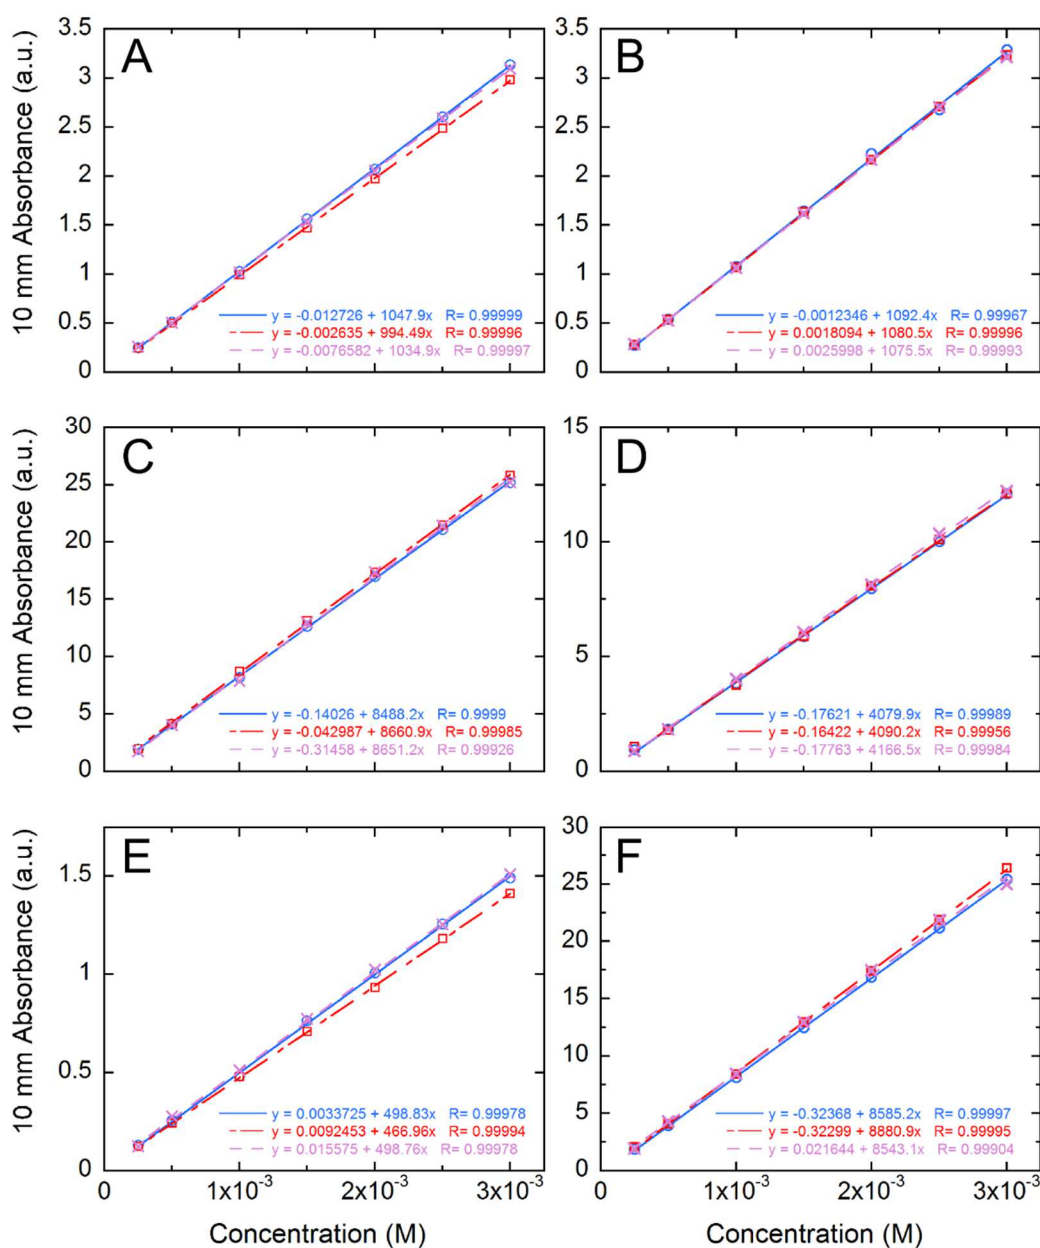

**Supplementary Figure 3: Determinations of extinction coefficients for *para*-substituted phenylalanine amino acids. A: *p*-amino-Phe. B: *p*-methoxy-Phe. C: *p*-methyl-Phe. D: *p*-fluoro-Phe. E: *p*-cyano-Phe. F: *p*-nitro-Phe. Conditions:**

| Amino acid            | Pathlength (mm) | Wavelength (nm) | Extinction coefficient ( $M^{-1} \text{ cm}^{-1}$ )* | Solvent                          |
|-----------------------|-----------------|-----------------|------------------------------------------------------|----------------------------------|
| <i>p</i> -amino-Phe   | 1               | 280             | $1015 \pm 29$                                        | PBS                              |
| <i>p</i> -methoxy-Phe | 1               | 280             | $1078 \pm 9$                                         | H <sub>2</sub> O                 |
| <i>p</i> -methyl-Phe  | 0.1             | 214             | $8573 \pm 85$                                        | H <sub>2</sub> O                 |
| <i>p</i> -fluoro-Phe  | 0.1             | 214             | $4151 \pm 31$                                        | H <sub>2</sub> O                 |
| <i>p</i> -cyano-Phe   | 1               | 280             | $494 \pm 5$                                          | H <sub>2</sub> O                 |
| <i>p</i> -nitro-Phe   | 0.1             | 280             | $8673 \pm 235$                                       | H <sub>2</sub> O:DMSO (1:1 vol%) |

\* Mean  $\pm$  1 standard deviation of 3 experiments

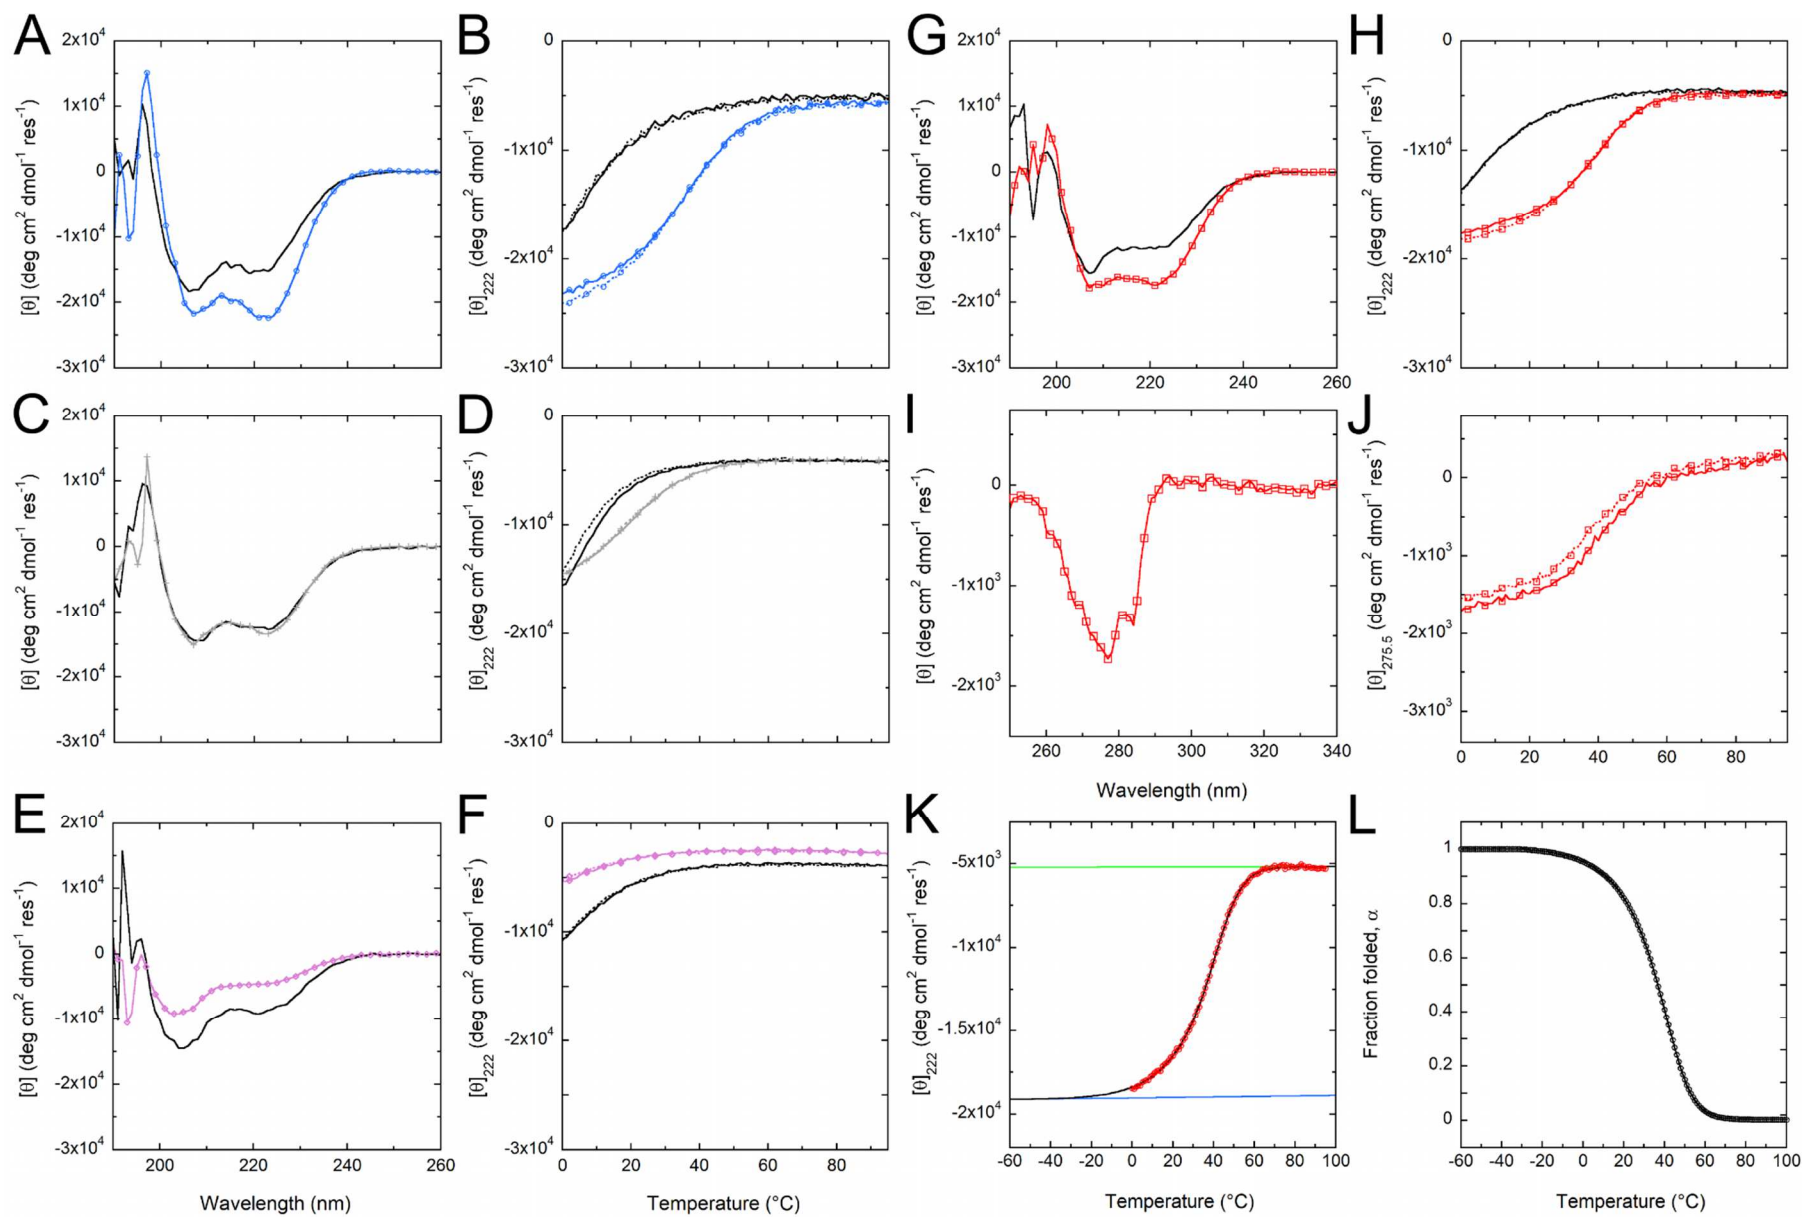



**Supplementary Figure 4: Additional CD spectra and thermal denaturation profiles for peptides in this study.** CD spectra recorded at 5 °C (A, C, E, G, I), and thermal denaturation curves (solid lines) and refolding profiles (dashed lines) monitored at 222 nm (B, D, F&H) and at 275.5 nm (J) for PP $\alpha$ -Trp (blue circles) and  $\alpha$ -Trp (black line), A&B; PP $\alpha$ -Phe (gray crosses) and  $\alpha$ -Phe (black line), C&D; PP $\alpha$ -His (lilac diamonds) and  $\alpha$ -His (black line), E&F; PP $\alpha$ -Tyr (red squares) and  $\alpha$ -Tyr (black line), G&H and PP $\alpha$ -Tyr measured in the near UV region, I&J. The  $T_M$  of PP $\alpha$ -Tyr when measured through the aromatic CD signal at 275.5 nm is 40 °C. **Conditions:** 100  $\mu$ M peptide in PBS, pH 7.4, 1 mm path length. Near UV spectra were recorded with a 1 cm path length. The identities and purities (>98 %) of  $\alpha$ -Tyr,  $\alpha$ -Trp,  $\alpha$ -Phe and  $\alpha$ -His were confirmed by MALDI-TOF mass spectrometry and analytical HPLC respectively (data not shown). Analytical ultracentrifugation sedimentation equilibrium experiments (data not shown) revealed  $\alpha$ -Tyr was 1.2 x its calculated monomer mass (99% confidence limits = 2975–3015) and  $\alpha$ -Trp was 1.3 x its calculated monomer mass (99% confidence limits = 3297–3402). The fits for  $\alpha$ -Phe to a single ideal species were not suitable for the experimental data and indicated aggregation.  $\alpha$ -His was not measured. For the Tyr-, Trp- and Phe-containing peptides the full-length PP $\alpha$  miniprotein has significantly more thermal stability than the  $\alpha$ -helix alone. Furthermore, the thermal denaturation profiles for the miniproteins are sigmoidal in shape, which suggests cooperative folding between the  $\alpha$ -helix and polyproline-II helices. PP $\alpha$ -His and  $\alpha$ -His are not well folded, consistent with an electron-poor His ring. **K&L:** An example of the thermal-denaturation curve-fitting procedure. **K:** Thermal-denaturation profile of PP $\alpha$ -Tyr (red circles) and the fitted data (black, solid line), see Materials and Methods for fitting equations. The calculated upper (green) and lower (blue) baselines are also shown. Note, we cannot access the fully folded state of PP $\alpha$ -Tyr experimentally. The lower baseline represents the theoretical CD signal of the fully folded state of the miniprotein and the upper baseline the fully unfolded state. **L:** Fraction folded,  $\alpha$ , of PP $\alpha$ -Tyr from curve fitting.

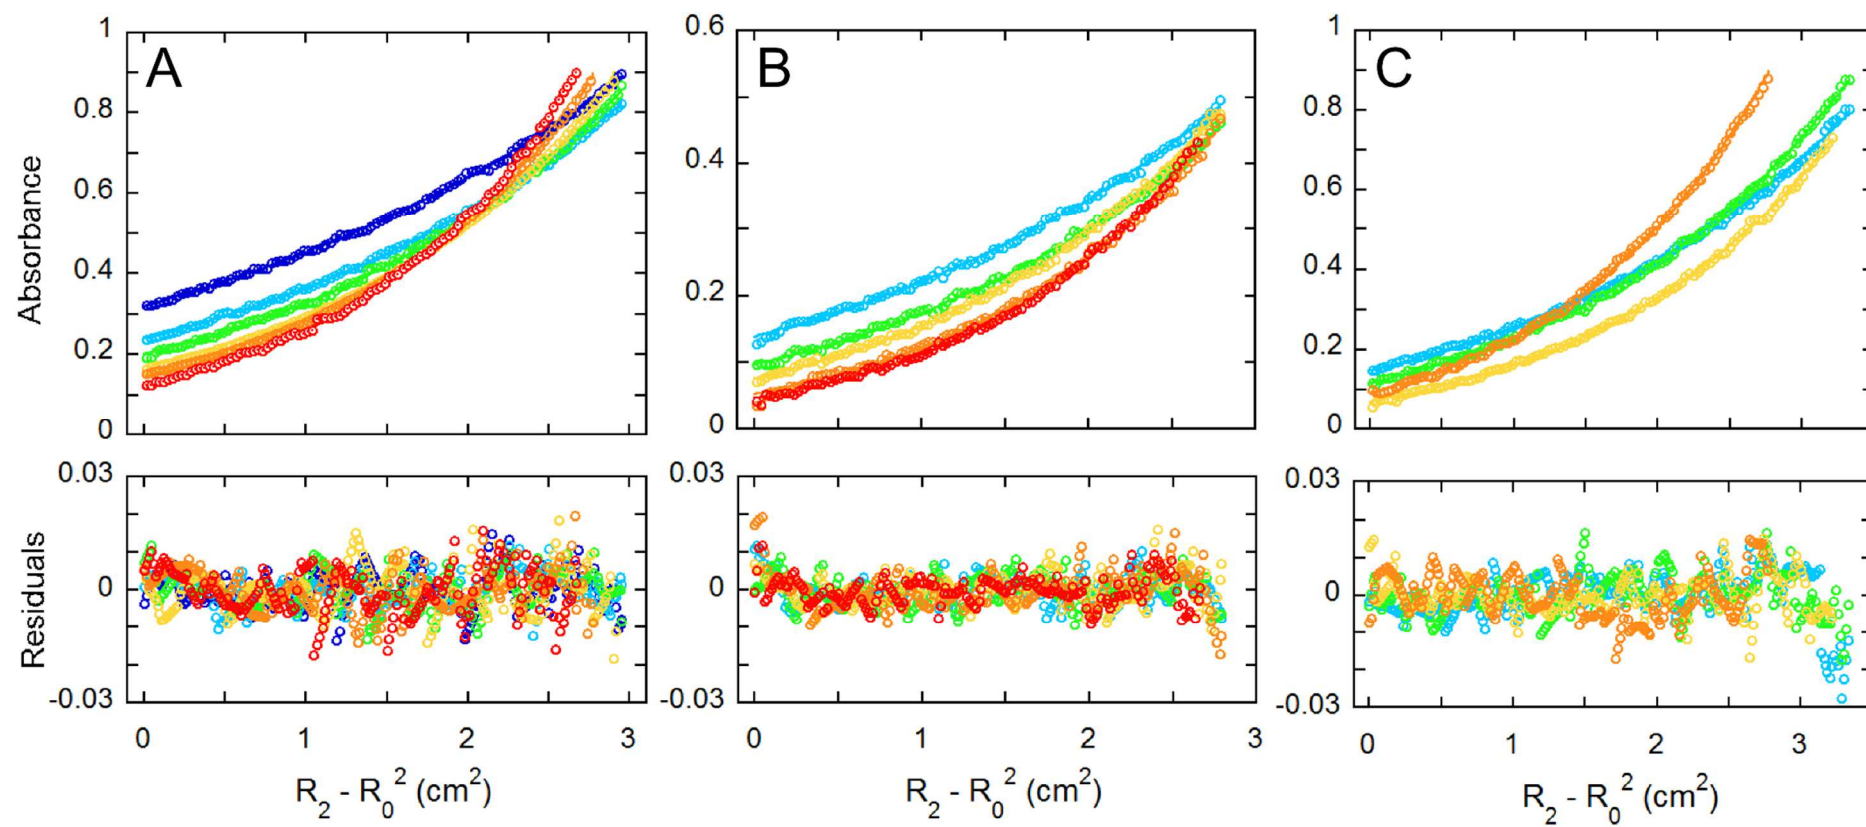

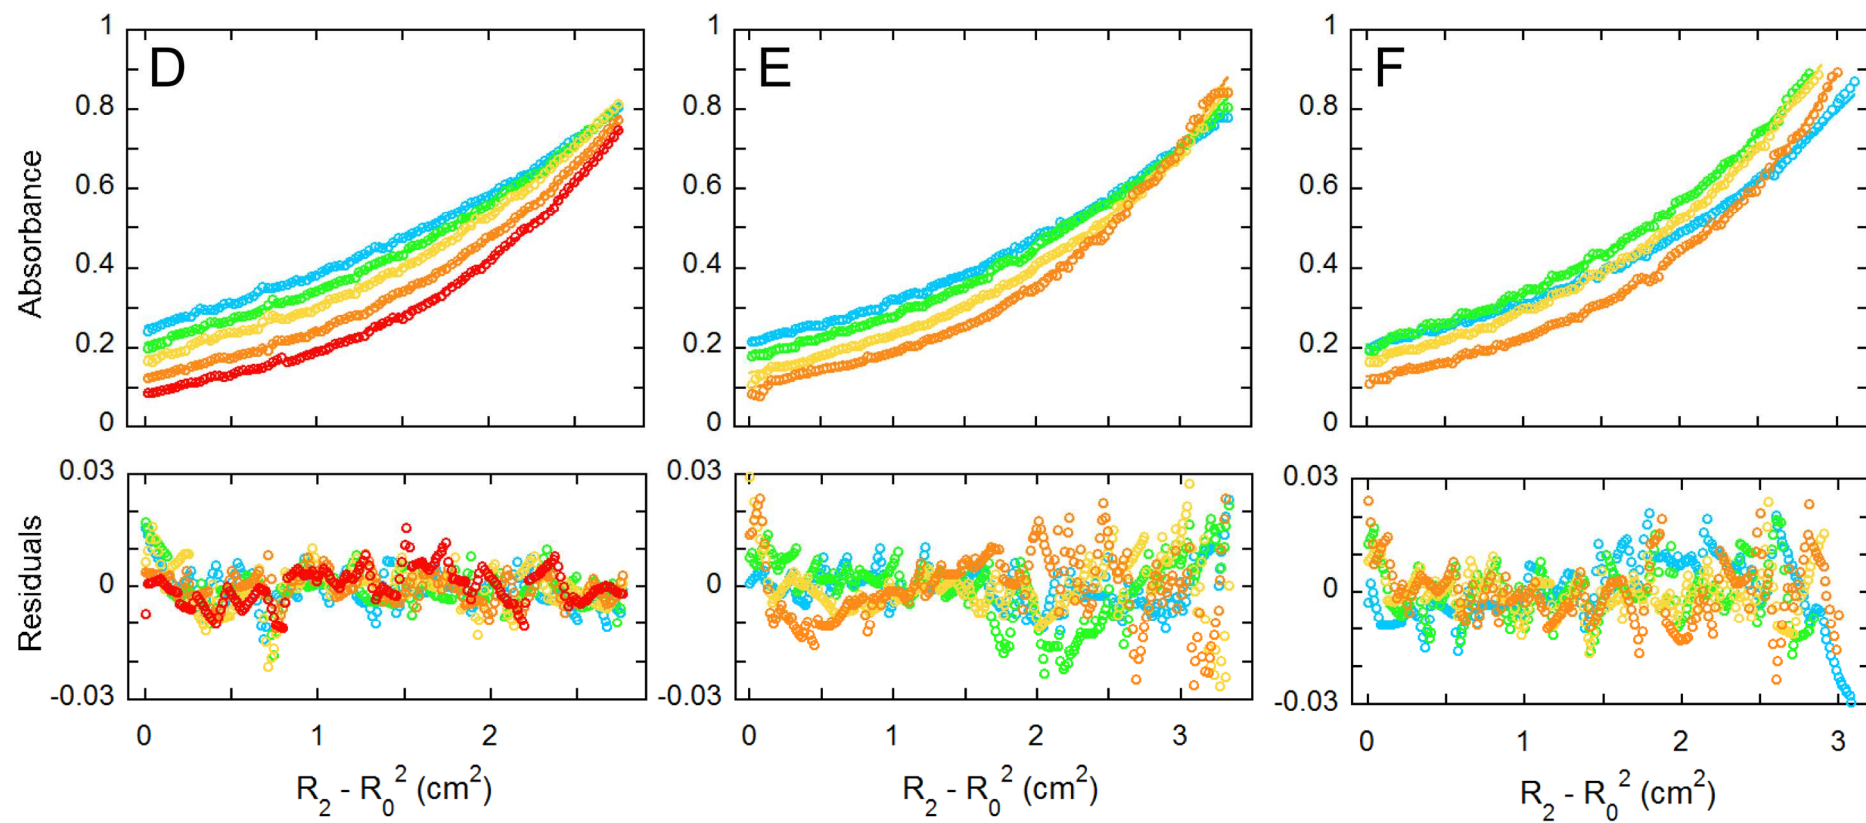

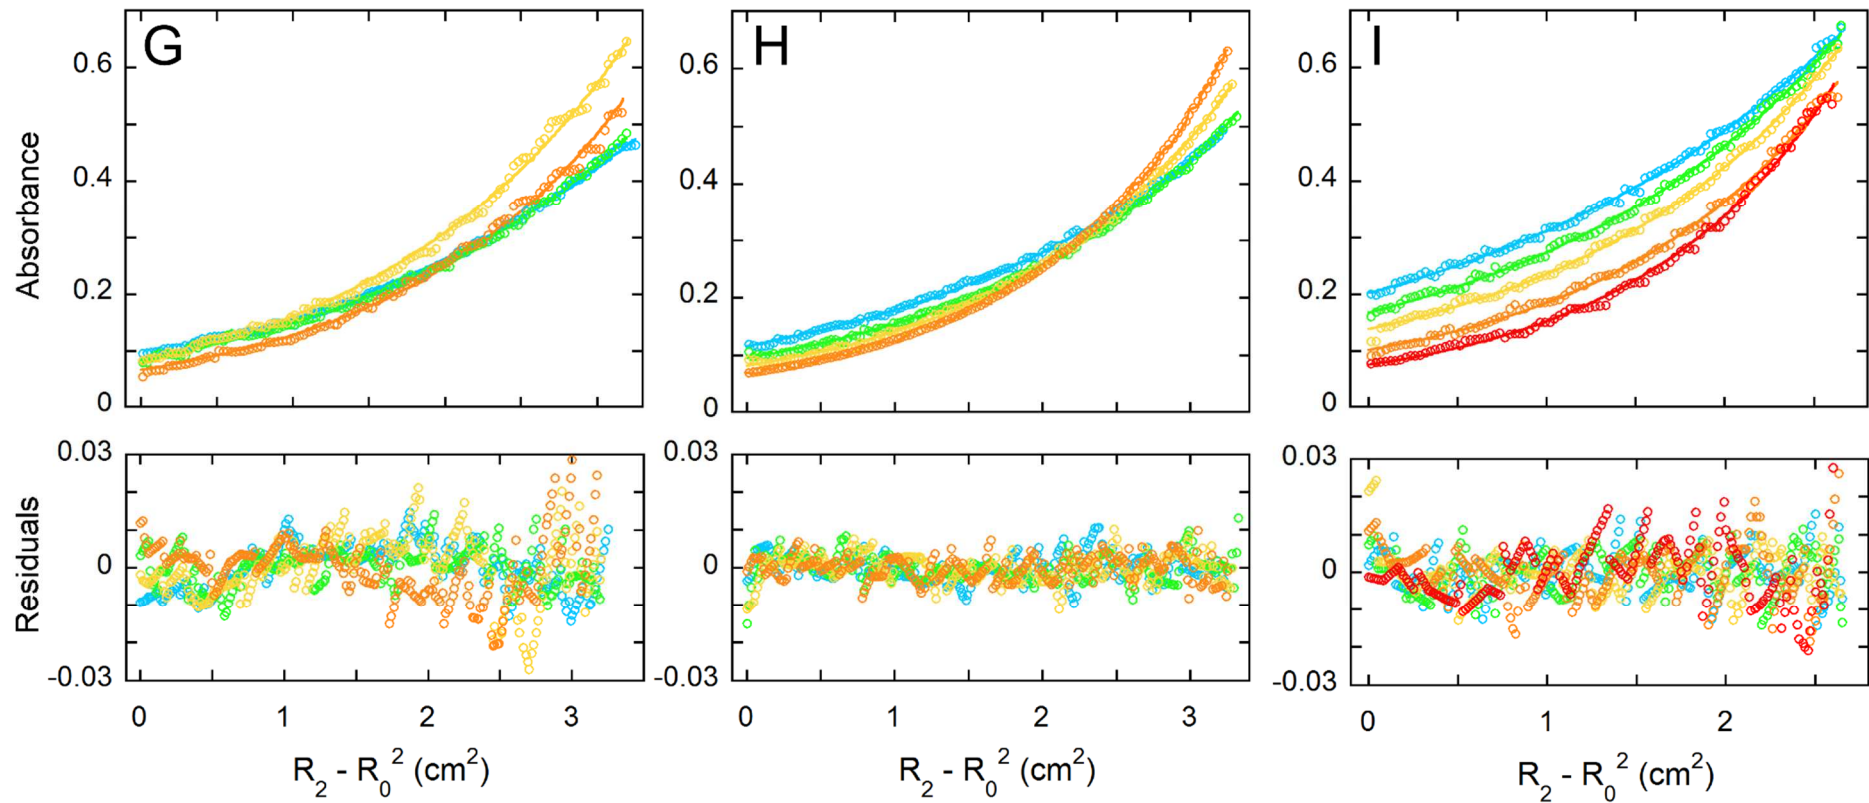

**Supplementary Figure 5: Additional AUC data for peptides in this study.** Sedimentation equilibrium AUC data (circles, upper panels) and fits to single ideal species (lines, upper panels) with residuals to the fits (lower panels) for PP $\alpha$  peptides. **A:** PP $\alpha$ -Tyr (280 nm). **B:** PP $\alpha$ -Trp (298 nm). **C:** PP $\alpha$ -Phe (235 nm). **D:** PP $\alpha$ - $\phi$ NH $_2$  (280 nm). **E:** PP $\alpha$ - $\phi$ OCH $_3$  (280 nm). **F:** PP $\alpha$ - $\phi$ CH $_3$  (235 nm). **G:** PP $\alpha$ - $\phi$ F (235 nm). **H:** PP $\alpha$ - $\phi$ CN (280 nm). **I:** PP $\alpha$ - $\phi$ NO $_2$  (325 nm). Conditions: 130  $\mu$ M peptide in PBS, pH 7.4. **Color key:** 40 krpm (dark blue), 44 krpm (light blue), 48 krpm (green), 52 krpm (yellow), 56 krpm (orange) and 60 krpm (red). The fits returned the following masses: PP $\alpha$ -Tyr, 3613 Da, (0.9 x monomer mass), 99% confidence limits = 3585–3642 Da; PP $\alpha$ -Trp, 3674 (0.9 x monomer mass), 99% confidence limits = 3621–3727 Da; PP $\alpha$ -Phe, 3757 Da (1.0 x monomer mass) 99% confidence limits = 3721–3792 Da; PP $\alpha$ - $\phi$ NH $_2$ , 3588 Da (0.9 x monomer mass), 99% confidence limits = 3561–3615 Da; PP $\alpha$ - $\phi$ OCH $_3$ , 3701 Da (1.0 x monomer mass), 99% confidence limits = 3647–3756 Da; PP $\alpha$ - $\phi$ CH $_3$ , 4183 Da (1.1 x monomer mass), 99% confidence limits = 4024–4975; PP $\alpha$ - $\phi$ F, 3661 (1.0 x monomer mass); PP $\alpha$ -CN, 4134 Da (1.1 x monomer mass); 99% confidence limits = 4099–4168 and PP $\alpha$ - $\phi$ NO $_2$  (4187, 1.1 x monomer mass), 99% confidence limits = 4107–4267.

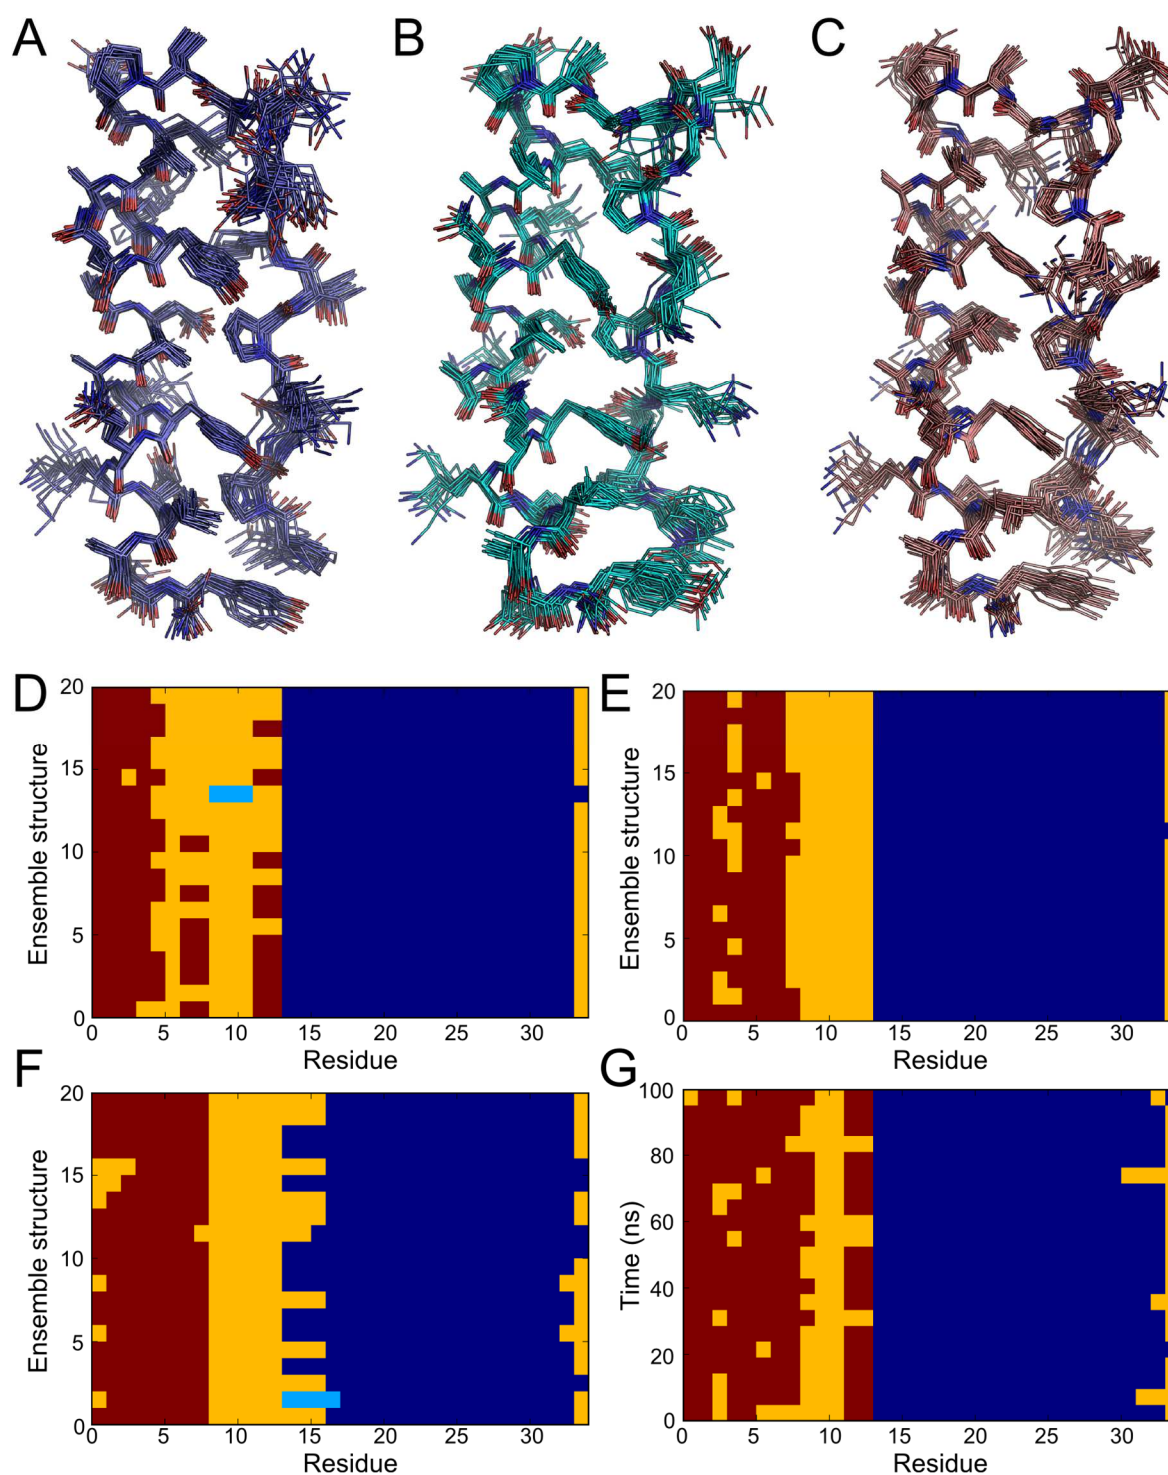

**Supplementary Figure 6: NMR ensemble structures and secondary structure assignment of PP $\alpha$  peptides.** **A-C:** NMR ensemble structures of **A:** PP $\alpha$ -Tyr, **B:** PP $\alpha$ - $\phi$ OCH $_3$ , and **C:** PP $\alpha$ - $\phi$ CH $_3$ . Chemical shift assignments, structure calculation and validation statistics are given in Table S1. **D-G:** secondary structure assignment of PP $\alpha$  structures. **D:** PP $\alpha$ -Tyr *in silico* after 100 ns of MD simulation, **E:** PP $\alpha$ -Tyr, **F:** PP $\alpha$ - $\phi$ OCH $_3$  and **G:** PP $\alpha$ - $\phi$ CH $_3$ . **Key D-G:** Polyproline-II, burgundy; bend, yellow; hydrogen-bonded turn (3, 4 or 5 turn), yellow;  $3_{10}$ -helix (min. length 3 residues), light blue; and  $\alpha$ -helix (min. length 4 residues), dark blue. N.B. Residue 0 = *N*-terminal acetyl cap.

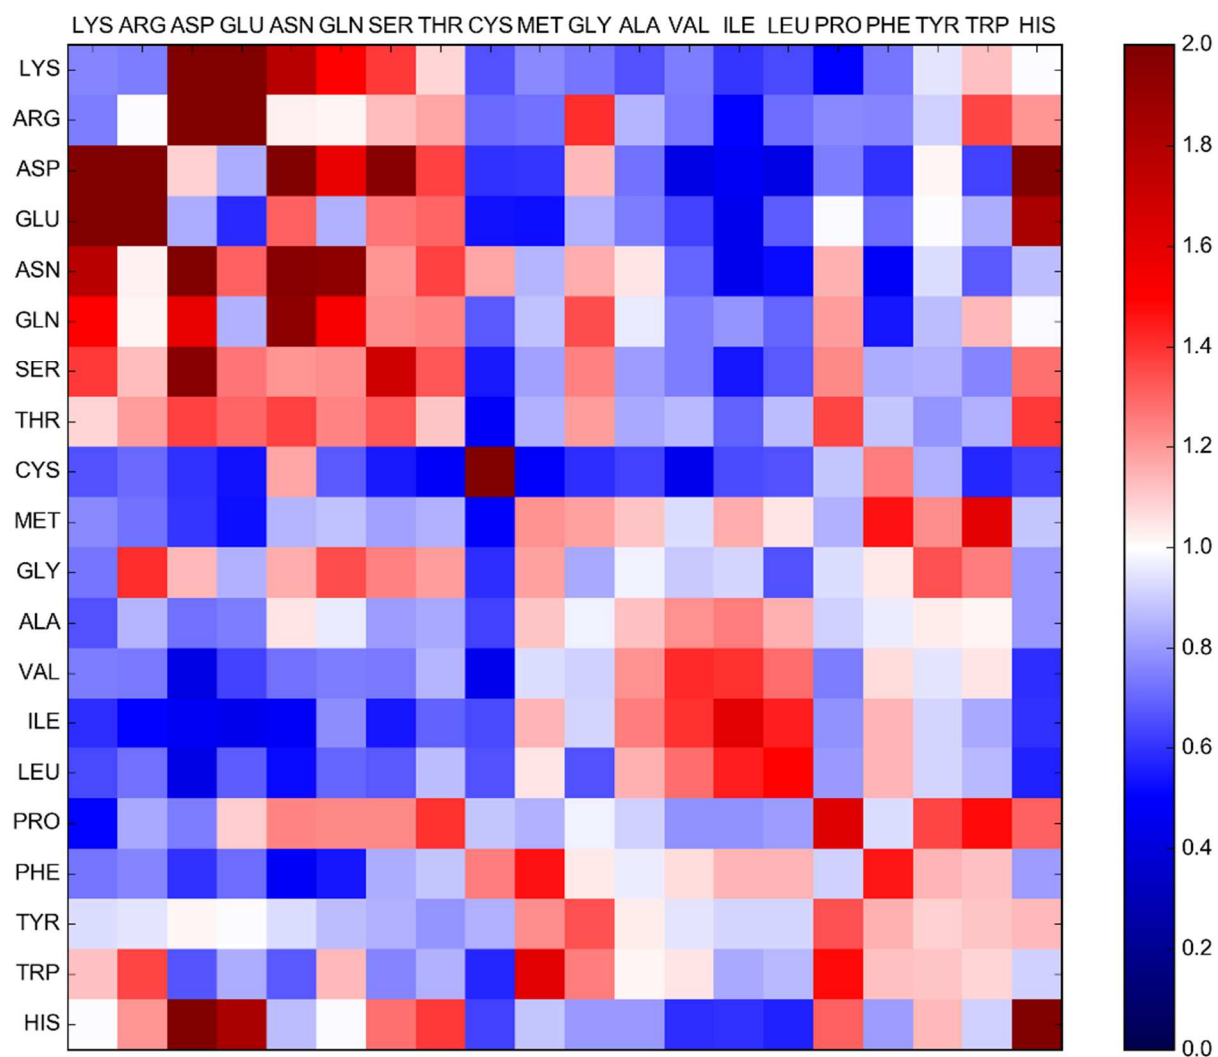

**Supplementary Figure 7: Propensities for amino acid side chains to be in close contact.** Normalized propensities of side chains to be within 3 Å vs. a random distribution from our high resolution dataset ( $\leq 1$  Å) of X-ray crystal structures from the PDB.

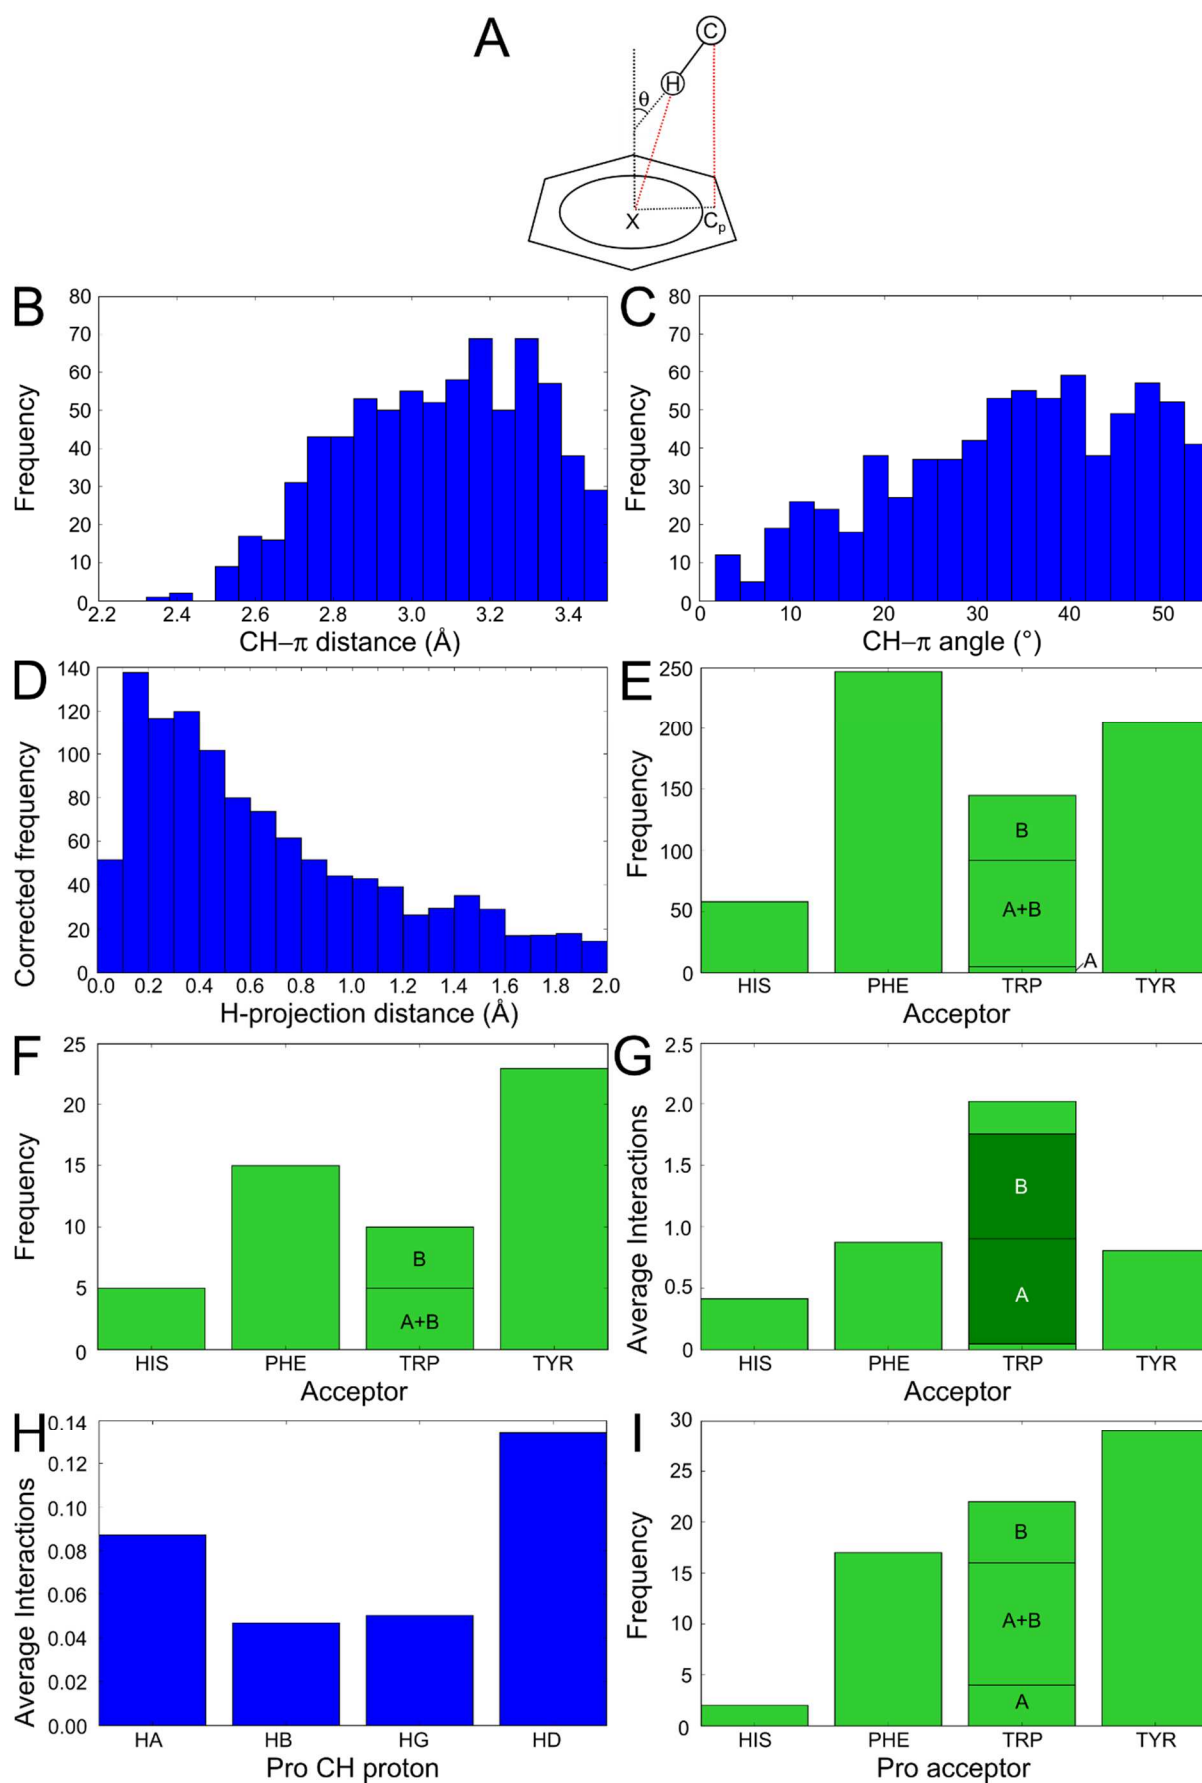

**Supplementary Figure 8: Analysis of CH- $\pi$  interactions in a sub-1 Å dataset and SH3, WW, EVH1 and Profilin binding domains from the PDB. A: Definition of a CH- $\pi$  interaction parameters. CH- $\pi$  distance**

(between the CH proton to center of the aromatic ring, i.e.  $H-X \leq 3.5$  Å. CH- $\pi$  angle (between the vector of the C-H bond and the normal to the plane of the aromatic ring)  $\theta \leq 55^\circ$ . C-projection distance (between the projection of the CH carbon to the plane of the aromatic ring and the center of the ring)  $\leq 1.6$  Å for the 5-membered TrpA ring and  $\leq 2.0$  Å for 6-membered rings (Phe, Tyr and TrpB). **B-D:** Distribution of parameters of CH- $\pi$  interactions identified in our non-redundant high resolution ( $\leq 1$  Å) dataset of protein X-ray crystal structures from the PDB. **B:** CH- $\pi$  distance, **C:** CH- $\pi$  angle, **D:** CH-projection distance (corrected by  $1/r$ ). **E-G:** Acceptor identities for all CH- $\pi$  interactions in the same dataset as B-D. **E:** Frequency of aromatic rings acting as CH- $\pi$  acceptors, **F:** Frequency of aromatic rings acting as CH- $\pi$  acceptors for Pro CH- $\pi$  donors and **G:** Average number of CH- $\pi$  interactions for aromatic rings as acceptors for all interactions in the dataset. Dark green bars for TrpA and TrpB represent residues where both rings participate in interactions. **H&I:** Residues that participate in CH- $\pi$  interactions in SH3, WW, EVH1 and Profilin. **H:** Average participation in CH- $\pi$  interactions as CH donor with binding-domain  $\pi$ -acceptors for Pro CH protons in bound ligands and **I:** Identity of CH- $\pi$  acceptor residues involved in CH- $\pi$  interactions of Pro residues in bound ligands.



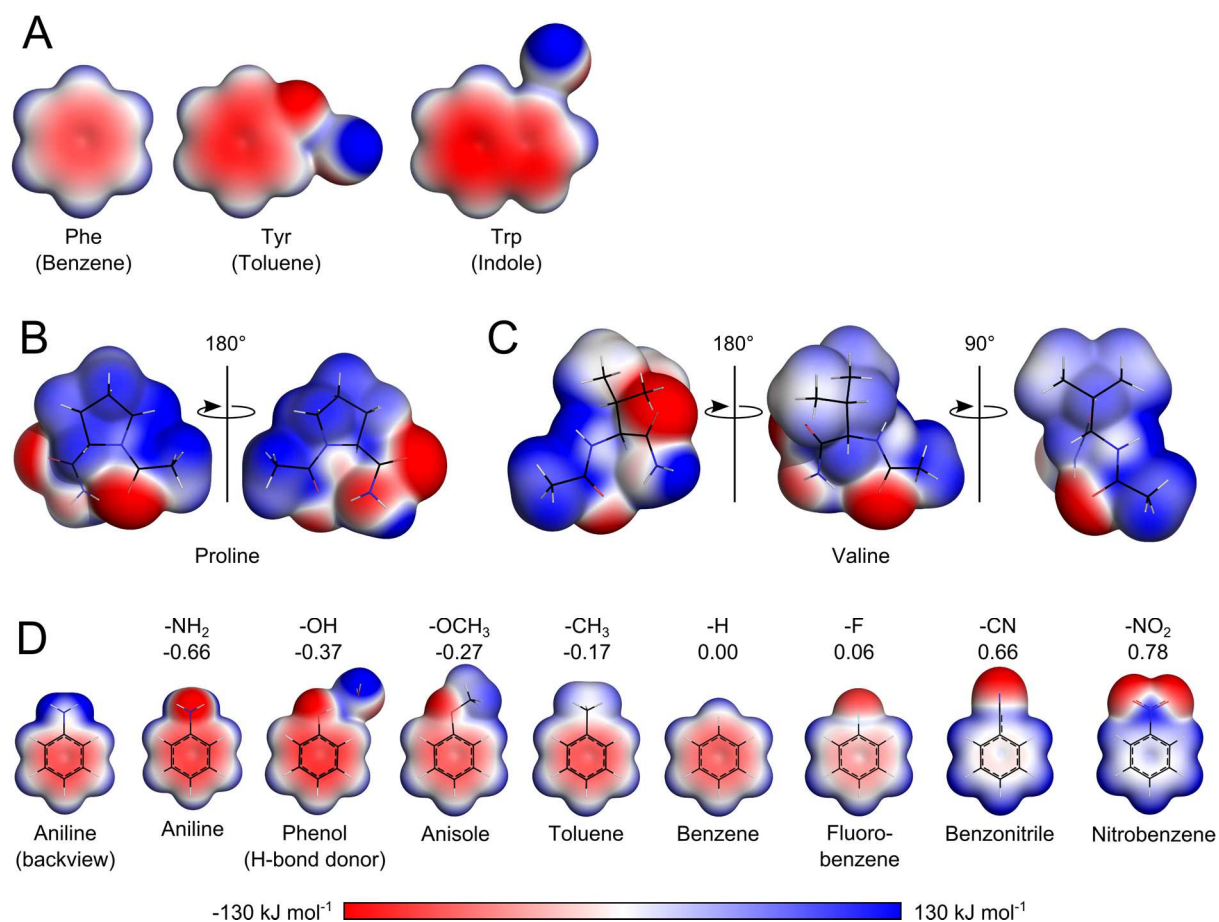

**Supplementary Figure 9: Electrostatic surface potentials (ESPs) of interfacial residues in PP $\alpha$  variants. A:** ESPs of Phe, Tyr, and Trp side chains. Tyr and Trp are shown as hydrogen-bond donors to a water molecule to best represent their solvated state. **B:** ESP of Pro and for comparison, **C:** Val. Both are capped at the *N*- and *C*-terminus with acetyl and amide groups respectively. Note the side chain of Pro is more electropositive than Val. **D:** ESPs for *para*-substituted benzene side chains from electron-rich phenol (side chain of Tyr) through electron poor-nitrobenzene (side chain of *para*-nitro-Phe). **Scale:**  $\leq -130$  kJ mol<sup>-1</sup> (electropositive, blue) through  $\geq 130$  kJ mol<sup>-1</sup> (electronegative, red).

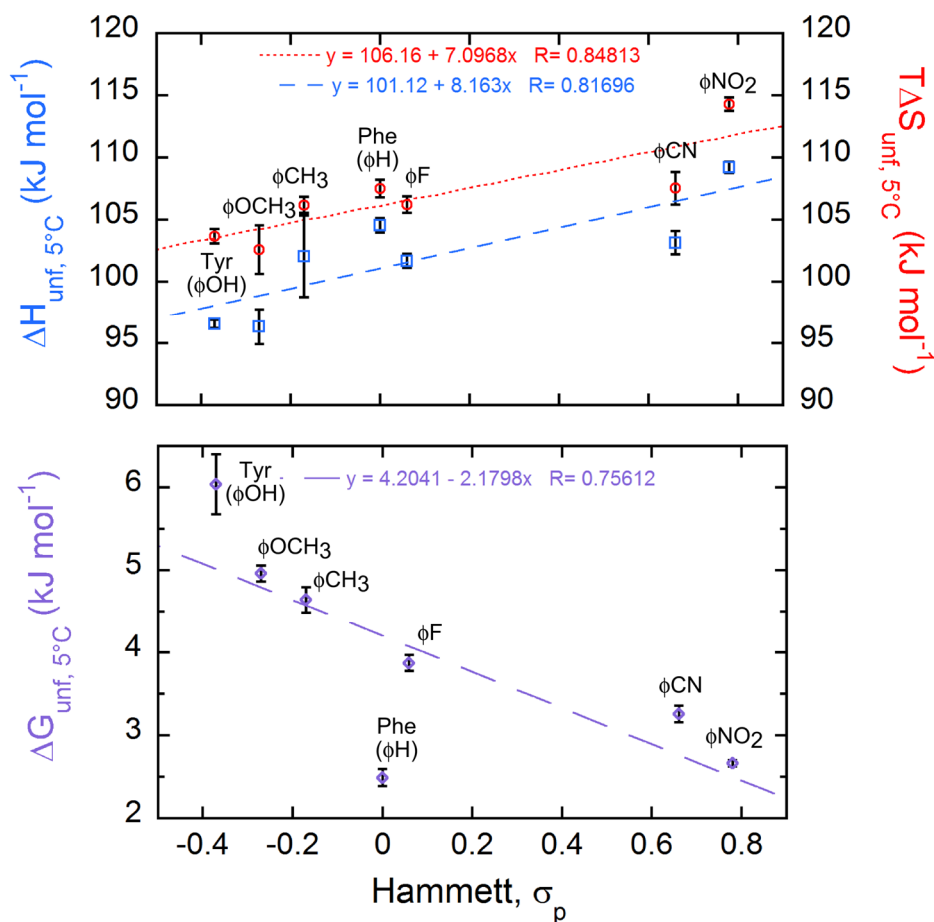

**Supplementary Figure 10: Van't Hoff analyses of PP $\alpha$  miniproteins.** Enthalpy of unfolding,  $\Delta H_{\text{unf}, 5^\circ\text{C}}$  (blue, squares), entropy of unfolding,  $\Delta S_{\text{unf}, 5^\circ\text{C}}$  (red, circles) and free energy of unfolding  $\Delta G_{\text{unf}, 5^\circ\text{C}}$  (diamonds, purple) at  $5^\circ\text{C}$  (where most of the peptides are fully folded) vs. Hammett  $\sigma_p$  constant of *para*-substituents for the PP $\alpha$  peptides. These values were obtained from curve fitting of the thermal denaturation curves obtained by CD spectroscopy. See Materials and Methods for fitting equations. Linear fits of the data are shown by the dotted lines.

## A Validation statistics

|                                              | PP $\alpha$ -Tyr       | PP $\alpha$ - $\phi$ CH <sub>3</sub> | PP $\alpha$ - $\phi$ OCH <sub>3</sub> |
|----------------------------------------------|------------------------|--------------------------------------|---------------------------------------|
| <b>NMR distance and dihedral constraints</b> |                        |                                      |                                       |
| Distance constraints                         |                        |                                      |                                       |
| Total NOE                                    | 583                    | 561                                  | 597                                   |
| Intra-residue                                | 245                    | 235                                  | 224                                   |
| <b>Inter-residue</b>                         |                        |                                      |                                       |
| Sequential ( $ i-j =1$ )                     | 103                    | 98                                   | 114                                   |
| Medium-range ( $ i-j <4$ )                   | 67                     | 66                                   | 81                                    |
| Long-range ( $ i-j >5$ )                     | 35                     | 45                                   | 44                                    |
| Ambiguous                                    | 133                    | 117                                  | 134                                   |
| Hydrogen bonds                               | 0                      | 0                                    | 0                                     |
| Total dihedral angle restraints              |                        |                                      |                                       |
| $\phi$                                       | 34                     | 36                                   | 33                                    |
| $\psi$                                       | 21                     | 22                                   | 22                                    |
| <b>Structure statistics</b>                  |                        |                                      |                                       |
| Violations (mean and s.d.)                   |                        |                                      |                                       |
| Distance constraints (Å)                     | 0.055 $\pm$ 0.016      | 0.057 $\pm$ 0.009                    | 0.022 $\pm$ 0.001                     |
| Dihedral angle constraints (°)               | 0.03 ( $\pm$ 0.036)    | 0.44 ( $\pm$ 0.071)                  | 0.34 ( $\pm$ 0.109)                   |
| Max. dihedral angle violation (°)            | 0                      | 0                                    | 0                                     |
| Max. distance constraint violation (> 0.3Å)  | 5.65 ( $\pm$ 1.52)     | 6.20 ( $\pm$ 1.57)                   | 0.0 ( $\pm$ 0.00)                     |
| Deviations from idealized geometry           |                        |                                      |                                       |
| Bond lengths (Å)                             | 0.0027 ( $\pm$ 0.0001) | 0.0026 ( $\pm$ 0.0001)               | 0.0031 ( $\pm$ 0.0001)                |
| Bond angles (°)                              | 0.429 ( $\pm$ 0.010)   | 0.434 ( $\pm$ 0.015)                 | 0.462 ( $\pm$ 0.015)                  |
| Impropers (°)                                | 0.932 ( $\pm$ 0.084)   | 1.056 ( $\pm$ 0.089)                 | 1.144 ( $\pm$ 0.144)                  |
| Average pairwise r.m.s. deviation** (Å)      |                        |                                      |                                       |
| backbone (2° structure)                      | 0.306 ( $\pm$ 0.085)   | 0.299 ( $\pm$ 0.100)                 | 0.310 ( $\pm$ 0.066)                  |
| Heavy atoms (2° structure)                   | 0.673 ( $\pm$ 0.105)   | 0.693 ( $\pm$ 0.087)                 | 0.700 ( $\pm$ 0.063)                  |
| Backbone, all residues                       | 0.514 ( $\pm$ 0.121)   | 0.520 ( $\pm$ 0.146)                 | 0.474 ( $\pm$ 0.107)                  |
| Heavy atoms, all residues                    | 0.825 ( $\pm$ 0.122)   | 0.828 ( $\pm$ 0.120)                 | 0.821 ( $\pm$ 0.100)                  |

\*\* Pairwise r.m.s. deviation was calculated among 20 refined structures.

100% of each peptide was in allowed regions of Ramachandran space.

B PP $\alpha$ -Tyr

| Residue    | H     | N      | HA              | CA    | CB    | Other                                                                                       |
|------------|-------|--------|-----------------|-------|-------|---------------------------------------------------------------------------------------------|
| Acetyl cap | -     | -      | -               | 26.03 | -     | 2.095:H*                                                                                    |
| Pro1       | -     | -      | 3.396           | 62.42 | -     | 1.708:HB2 1.889:HB3 1.880:HG2 1.935:HG3 3.504:HD2<br>3.568:HD3 53.21:CD                     |
| Pro2       | -     | -      | 4.538           | 64.43 | -     | 2.101:HB2 2.365:HB3 1.638:HG2 1.725:HG3 3.166:HD2<br>3.216:HD3                              |
| Thr3       | 8.869 | 116.48 | 4.279           | 63.88 | 71.91 | 3.926:HB 1.132:HG2* 23.57:CG2                                                               |
| Lys4       | 8.78  | 129.22 | 3.074           | 56.56 | -     | 1.264:HB2 1.461:HB3 1.215:HG2 1.550:HG3 0.711:HD2<br>1.269:HD3 2.972:HE2 2.972:HE3 26.45:CD |
| Pro5       | -     | -      | 4.511           | 64.43 | 71.91 | 2.036:HB2 2.400:HB3 1.596:HG2 1.718:HG3 3.072:HD2<br>3.470:HD3 52.34:CD                     |
| Thr6       | 8.802 | 118.00 | 4.126           | 64.36 | -     | 3.936:HB 1.177:HG2* 23.77:CG2                                                               |
| Lys7       | 8.727 | 128.05 | 3.476           | 56.99 | -     | 1.520:HB2 1.583:HB3 1.018:HG2 1.340:HG3 1.569:HD2<br>1.569:HD3 2.810:HE2 2.946:HE3          |
| Pro8       | -     | -      | 4.363           | 64.62 | -     | 1.782:HB2 2.163:HB3 1.692:HG2 1.694:HG3 2.810:HD2<br>3.050:HD3 52.29:CD                     |
| Gly9       | 8.372 | 106.63 | 4.036,<br>3.867 | 46.27 | -     |                                                                                             |
| Asp10      | 8.543 | 117.58 | 4.337           | 58.11 | -     | 2.527:HB2 2.603:HB3                                                                         |
| Asn11      | 8.642 | 114.64 | 4.677           | 54.78 | -     | 2.860:HB2 2.860:HB3 7.027:HD21 7.729:HD22 112.00:ND2                                        |
| Ala12      | 7.437 | 120.78 | 4.297           | 54.50 | 21.95 | 1.397:HB*                                                                                   |
| Thr13      | 7.735 | 110.03 | 4.572           | -     | 70.31 | 4.830:HB 1.454:HG2* 24.58:CG                                                                |
| Pro14      | -     | -      | 4.248           | 67.78 | -     | 1.974:HB2 2.089:HB3 2.260:HG2 2.430:HG3 3.924:HD2<br>3.984:HD3 52.41:CD                     |
| Glu15      | 9.072 | 116.53 | 4.162           | 62.14 | -     | 1.970:HB2 2.137:HB3 2.330:HG2 2.399:HG3 38.62:CG                                            |
| Lys16      | 7.868 | 120.85 | 4.175           | -     | -     | 1.832:HB2 2.069:HB3                                                                         |
| Leu17      | 8.415 | 120.51 | 4.145           | -     | -     | 1.647:HB2 1.872:HB3 0.865:HD1* 0.889:HD2*                                                   |
| Ala18      | 8.421 | 121.15 | 4.250           | -     | -     | 1.515:HB*                                                                                   |
| Lys19      | 8.015 | 119.80 | 4.208           | -     | -     | 1.967:HB2 2.024:HB3                                                                         |
| Tyr20      | 7.948 | 117.80 | 4.563           | 61.73 | -     | 3.132:HB2 3.221:HB3 7.157:HD* 6.813:HE* 135.30:CD*<br>120.23:CE*                            |
| Gln21      | 8.105 | 115.18 | 3.670           | 60.00 | -     | 2.167:HB2 2.204:HB3 2.621:HG2 2.621:HG3 7.096:HE21<br>7.749:HE22 35.72:CG 110.99:NE2        |
| Ala22      | 7.928 | 121.99 | 4.246           | -     | -     | 1.563:HB*                                                                                   |
| Asp23      | 9.182 | 121.15 | 4.418           | -     | -     | 2.448:HB2 2.856:HB3                                                                         |
| Leu24      | 9.211 | 123.85 | 3.943           | 59.90 | -     | 1.404:HB2 1.567:HB3 0.829:HD1* 0.974:HD2*                                                   |
| Ala25      | 7.771 | 120.51 | 4.203           | -     | -     | 1.518:HB*                                                                                   |
| Lys26      | 7.896 | 118.68 | 4.114           | -     | -     | 1.930:HB2 2.002:HB3                                                                         |
| Tyr27      | 8.260 | 119.01 | 4.428           | -     | -     | 3.225:HB2 3.276:HB3 7.033:HD* 6.629:HE* 135.50:CD*<br>119.79:CE*                            |
| Gln28      | 8.407 | 115.37 | 3.616           | 60.87 | -     | 2.044:HB2 2.193:HB3 2.576:HG2 2.701:HG3 7.028:HE21<br>7.507:HE22 109.30:NE2                 |
| Lys29      | 7.601 | 120.36 | 4.106           | -     | -     | 1.911:HB2 2.057:HB3                                                                         |
| Asp30      | 8.988 | 119.70 | 4.327           | -     | -     | 2.510:HB2 2.744:HB3                                                                         |
| Leu31      | 8.986 | 121.19 | 3.825           | 59.77 | -     | 1.379:HB2 1.498:HB3 0.820:HD1* 0.964:HD2*                                                   |
| Ala32      | 7.584 | 121.27 | 4.109           | -     | -     | 1.522:HB*                                                                                   |
| Asp33      | 8.152 | 116.23 | 4.424           | -     | -     | 2.707:HB2 2.707:HB3                                                                         |
| Tyr34      | 7.957 | 120.25 | 4.164           | 60.96 | -     | 3.033:HB2 3.221:HB3 7.162:HD* 6.766:HE* 135.30:CD*<br>120.08:CE*                            |

C PP $\alpha$ - $\phi$ OCH $_3$ 

| Residue            | H     | N      | HA              | CA    | CB    | Other                                                                               |
|--------------------|-------|--------|-----------------|-------|-------|-------------------------------------------------------------------------------------|
| Acetyl cap         | -     | -      | -               | 25.99 | -     | 2.087:H*                                                                            |
| Pro1               | -     | -      | 3.496           | 62.47 | -     | 1.700:HB2 1.855:HB3 1.861:HG2 1.861:HG3 3.441:HD2<br>3.564:HD3 53.07:CD             |
| Pro2               | -     | -      | 4.515           | 64.48 | -     | 2.081:HB2 2.442:HB3 1.612:HG2 1.613:HG3 3.077:HD2<br>3.477:HD3                      |
| Thr3               | 8.676 | 117.15 | 4.112           | 64.28 | 72.15 | 3.939:HB 1.194:HG2* 23.79:CG2                                                       |
| Lys4               | 8.804 | 129.17 | 2.949           | 56.67 | -     | 1.076:HB2 1.140:HB3 1.196:HG2 1.197:HG3 0.603:HD2<br>1.517:HD3 2.836:HE2 2.836:HE3  |
| Pro5               | -     | -      | 4.542           | 64.54 | -     | 2.116:HB2 2.390:HB3 1.701:HG2 1.739:HG3 3.157:HD2<br>3.259:HD3                      |
| Thr6               | 8.768 | 115.78 | 4.299           | 63.55 | -     | 3.941:HB 1.140:HG2*                                                                 |
| Lys7               | 8.780 | 127.65 | 3.324           | 56.97 | -     | 1.552:HB2 0.992:HG2 0.992:HG3 1.307:HD2 1.411:HD3<br>2.938:HE2 2.939:HE3            |
| Pro8               | -     | -      | 4.361           | 64.66 | -     | 1.778:HB2 2.158:HB3 1.687:HG2 1.688:HG3 2.819:HD2<br>2.975:HD3                      |
| Gly9               | 8.373 | 107.12 | 3.883,<br>4.017 | 46.23 | -     |                                                                                     |
| Asp10              | 8.547 | 118.15 | 4.335           | -     | -     | 2.523:HB2 2.654:HB3                                                                 |
| Asn11              | 8.649 | 115.11 | 4.672           | 54.76 | 39.57 | 2.862:HB2 2.862:HB3 7.026:HD21 7.725:HD22 112.47:ND2                                |
| Ala12              | 7.444 | 121.22 | 4.291           | 54.60 | 21.87 | 1.394:HB*                                                                           |
| Thr13              | 7.723 | 110.54 | 4.575           | 61.79 | 70.43 | 4.830:HB 1.454:HG2*                                                                 |
| Pro14              | -     | -      | 4.253           | 67.80 | -     | 1.977:HB2 1.978:HB3 2.091:HG2 2.261:HG3 3.925:HD2<br>3.983:HD3 52.38:CD             |
| Glu15              | 9.071 | 117.01 | 4.162           | 62.01 | -     | 1.970:HB2 2.140:HB3 2.339:HG2 2.418:HG3 38.68:CG                                    |
| Lys16              | 7.873 | 121.32 | 4.180           | -     | -     | 1.837:HB2 2.077:HB3                                                                 |
| Leu17              | 8.407 | 121.05 | 4.145           | -     | -     | 1.658:HB2 1.878:HB3 0.867:HD1* 0.891:HD2*                                           |
| Ala18              | 8.426 | 121.61 | 4.249           | -     | -     | 1.517:HB*                                                                           |
| Lys19              | 8.036 | 120.28 | 4.207           | -     | -     | 1.970:HB2 2.036:HB3                                                                 |
| $\phi$ OCH $_3$ 20 | 7.942 | 118.29 | 4.591           | 63.14 | -     | 3.193:HB2 3.264:HB3 7.254:HD* 6.716:HE* 135.19:CD*<br>118.29:CE* 3.768:HM* 59.82:CM |
| Gln21              | 8.092 | 115.76 | 3.661           | 60.75 | -     | 2.171:HB2 2.204:HB3 2.624:HG2 2.624:HG3 7.097:HE21<br>7.761:HE22 111.41:NE2         |
| Ala22              | 7.985 | 122.59 | 4.236           | -     | 19.95 | 1.563:HB*                                                                           |
| Asp23              | 9.223 | 121.50 | 4.426           | -     | -     | 2.465:HB2 2.850:HB3                                                                 |
| Leu24              | 9.145 | 124.36 | 3.916           | 59.79 | -     | 1.424:HB2 1.597:HB3 0.788:HD1* 0.867:HD2*                                           |
| Ala25              | 7.799 | 121.06 | 4.202           | -     | -     | 1.517:HB*                                                                           |
| Lys26              | 7.933 | 119.22 | 4.106           | -     | -     | 1.929:HB2 2.014:HB3 1.520:HG2 1.520:HG3                                             |
| $\phi$ OCH $_3$ 27 | 8.234 | 119.39 | 4.429           | 62.80 | -     | 3.256:HB2 3.321:HB3 7.112:HD* 6.808:HE* 135.48:CD*<br>118.44:CE* 3.815:HM* 59.87:CM |
| Gln28              | 8.376 | 115.97 | 3.606           | 60.78 | -     | 2.204:HB2 2.204:HB3 2.575:HG2 2.705:HG3 7.017:HE21<br>7.531:HE22 109.67:NE2         |
| Lys29              | 7.658 | 120.92 | 4.101           | -     | -     | 1.911:HB2 2.052:HB3 1.513:HG2 1.514:HG3                                             |
| Asp30              | 9.001 | 120.00 | 4.322           | -     | -     | 2.519:HB2 2.747:HB3                                                                 |
| Leu31              | 8.846 | 121.34 | 3.830           | -     | -     | 0.896:HB2 1.509:HB3 0.752:HD1* 0.791:HD2*                                           |
| Ala32              | 7.595 | 121.67 | 4.110           | -     | -     | 1.519:HB*                                                                           |
| Asp33              | 8.136 | 116.62 | 4.430           | -     | -     | 2.696:HB2 2.696:HB3                                                                 |
| $\phi$ OCH $_3$ 34 | 7.948 | 120.60 | 4.185           | -     | -     | 3.085:HB2 3.221:HB3 7.249:HD* 6.912:HE* 135.32:CD*<br>118.71:CE* 3.801:HM* 59.88:CM |

D PP $\alpha$ - $\phi$ CH<sub>3</sub>

| Residue                   | H     | N      | HA              | CA    | CB    | Other                                                                               |
|---------------------------|-------|--------|-----------------|-------|-------|-------------------------------------------------------------------------------------|
| Acetyl cap                | -     | -      | -               | 26.03 | -     | 2.098:H*                                                                            |
| Pro1                      | -     | -      | 3.664           | 62.59 | -     | 1.757:HB2 1.896:HB3 1.758:HG2 1.897:HG3 3.496:HD2<br>3.573:HD3                      |
| Pro2                      | -     | -      | 4.549           | 64.49 | -     | 2.103:HB2 2.372:HB3 1.708:HG2 1.760:HG3 3.207:HD2<br>3.302:HD3                      |
| Thr3                      | 8.672 | 114.57 | 4.33            | 63.31 | 72.23 | 3.937:HB 1.147:HG2* 23.56:CG2                                                       |
| Lys4                      | 8.686 | 128.41 | 2.870           | 56.50 | -     | 1.370:HB2 1.425:HB3 0.647:HG2 1.122:HG3 1.370:HD2<br>1.370:HD3 2.864:HE2 2.903:HE3  |
| Pro5                      | -     | -      | 4.495           | 64.49 | -     | 2.398:HB2 1.561:HG2 1.664:HG3 3.101:HD2 3.421:HD3                                   |
| Thr6                      | 8.584 | 115.87 | 4.126           | 64.29 | 72.25 | 3.946:HB 1.192:HG2* 23.76:CG2                                                       |
| Lys7                      | 8.640 | 127.25 | 3.258           | 56.7  | -     | 1.539:HB* 0.952:HG2 0.952:HG3 1.334:HD2 1.451:HD3<br>2.929:HE2 2.929:HE3            |
| Pro8                      | -     | -      | 4.354           | 64.75 | -     | 1.777:HB2 2.181:HB3 1.696:HG2 1.704:HG3 2.849:HD2<br>3.006:HD3                      |
| Gly9                      | 8.366 | 106.69 | 3.866,<br>4.009 | 46.37 | -     |                                                                                     |
| Asp10                     | 8.536 | 117.72 | 4.344           | -     | -     | 2.530:HB2 2.654:HB3                                                                 |
| Asn11                     | 8.644 | 114.75 | 4.670           | 54.81 | 39.59 | 2.862:HB2 2.863:HB3 7.028:HD21 7.726:HD21 111.99:ND2                                |
| Ala12                     | 7.489 | 120.87 | 4.288           | 54.71 | 21.87 | 1.397:HB*                                                                           |
| Thr13                     | 7.700 | 110.06 | 4.579           | -     | 70.31 | 4.827:HB 1.454:HG2* 24.48:CG2                                                       |
| Pro14                     | -     | -      | 4.257           | 67.77 | -     | 1.980:HB2 1.982:HB3 2.091:HG2 2.261:HG3 3.925:HD2<br>3.985:HD3                      |
| Glu15                     | 9.074 | 116.64 | 4.167           | -     | -     | 1.973:HB2 2.141:HB3 2.345:HG2 2.420:HG3                                             |
| Lys16                     | 7.882 | 120.75 | 4.179           | -     | -     | 1.830:HB2 2.076:HB3                                                                 |
| Leu17                     | 8.398 | 120.61 | 4.157           | -     | -     | 1.653:HB2 1.893:HB3 0.863:HD1* 0.892:HD2* 25.00:CD1<br>26.96:CD2                    |
| Ala18                     | 8.427 | 121.39 | 4.261           | -     | -     | 1.521:HB*                                                                           |
| Lys19                     | 8.045 | 119.95 | 4.210           | -     | -     | 1.972:HB2 2.045:HB3 1.523:HG2 1.526:HG3                                             |
| $\phi$ CH <sub>3</sub> 20 | 7.965 | 118.00 | 4.588           | 61.71 | -     | 2.289:HM* 3.174:HB2 3.249:HB3 7.194:HD* 6.974:HE*<br>25.15:CM 133.98:CD* 134.19:CE* |
| Gln21                     | 8.019 | 114.88 | 3.705           | 60.68 | -     | 2.180:HB2 2.193:HB3 2.620:HG2 2.688:HG3 7.092:HE21<br>7.773:HE22 111.27:NE2         |
| Ala22                     | 7.974 | 122.20 | 4.235           | -     | 19.96 | 1.563:HB*                                                                           |
| Asp23                     | 9.186 | 121.25 | 4.427           | -     | -     | 2.475:HB2 2.845:HB3                                                                 |
| Leu24                     | 9.086 | 123.89 | 3.916           | 59.71 | -     | 0.931:HB2 1.571:HB3 0.807:HD1* 0.809:HD2*                                           |
| Ala25                     | 7.811 | 120.62 | 4.200           | -     | -     | 1.522:HB*                                                                           |
| Lys26                     | 7.931 | 118.77 | 4.108           | -     | -     | 1.928:HB2 2.018:HB3 1.520:HG2 1.521:HG3                                             |
| $\phi$ CH <sub>3</sub> 27 | 8.198 | 119.12 | 4.444           | -     | -     | 2.338:HM* 3.249:HB2 3.317:HB3 7.066:HD* 7.038:HE*<br>25.85:CM 133.97:CD* 134.24:CE1 |
| Gln28                     | 8.321 | 115.08 | 3.641           | 60.73 | -     | 2.050:HB2 2.184:HB3 2.561:HG2 2.681:HG3 6.997:HE21<br>7.490:HE22 109.32:NE2         |
| Lys29                     | 7.708 | 120.48 | 4.099           | -     | -     | 1.906:HB2 2.046:HB3                                                                 |
| Asp30                     | 8.935 | 119.62 | 4.325           | -     | -     | 2.525:HB2 2.756:HB3                                                                 |
| Leu31                     | 8.709 | 120.71 | 3.840           | 59.49 | -     | 1.381:HB2 1.481:HB3 0.762:HD1* 1.013:HD2*                                           |
| Ala32                     | 7.600 | 121.11 | 4.111           | -     | -     | 1.509:HB*                                                                           |
| Asp33                     | 8.161 | 116.32 | 4.433           | -     | -     | 2.677:HB2 2.679:HB3                                                                 |
| $\phi$ CH <sub>3</sub> 34 | 7.976 | 119.99 | 4.235           | -     | -     | 2.285:HM* 3.092:HB2 3.197:HB3 7.186:HD* 7.168:HE*<br>25.27:CM 134.08:CD* 134.03:CE1 |

E PP $\alpha$ - $\phi$ Phe

| Residue    | H     | N      | HA              | CA    | CB    | Other                                                                       |
|------------|-------|--------|-----------------|-------|-------|-----------------------------------------------------------------------------|
| Acetyl cap | -     | -      | -               | 26.06 | -     | 2.094:H*                                                                    |
| Pro1       | -     | -      | 3.693           | 62.50 | -     | 1.746:HB2 1.939:HB3 1.921:HG2 1.921:HG3 3.545:HD2<br>3.558:HD3              |
| Pro2       | -     | -      | 4.557           | 64.55 | -     | 2.357:HB* 1.741:HG2 1.830:HG3 3.273:HD2 3.385:HD3                           |
| Thr3       | 8.697 | 114.94 | 4.307           | 63.68 | 72.20 | 3.959:HB 1.148:HG2*                                                         |
| Lys4       | 8.611 | 128.10 | 3.067           | -     | -     | 1.219:HG2 1.556:HG3 0.705:HD2 1.222:HD3 2.929:HE2<br>2.929:HE3              |
| Pro5       | -     | -      | 4.508           | 64.75 | -     | 2.070:HB2 2.393:HB3 1.767:HG2 3.140:HD2 3.492:HD3                           |
| Thr6       | 8.618 | 116.15 | 4.138           | 64.21 | 71.84 | 3.960:HB 1.181:HG2*                                                         |
| Lys7       | 8.580 | 127.18 | 3.334           | -     | -     | 1.458:HB2 1.513:HB3 1.181:HG2 1.181:HG3                                     |
| Pro8       | -     | -      | 4.364           | 64.88 | -     | 2.202:HB2 2.545:HB3 1.751:HG2 1.817:HG3 2.904:HD2<br>3.129:HD3              |
| Gly9       | 8.390 | 106.74 | 3.880,<br>4.012 | 46.53 | -     |                                                                             |
| Asp10      | 8.506 | 117.77 | 4.361           | -     | -     | 2.544:HB2 2.660:HB3                                                         |
| Asn11      | 8.624 | 114.91 | 4.673           | -     | 39.72 | 2.856:HB2 2.856:HB3 7.024:HD21 7.724:HD22 111.98:ND2                        |
| Ala12      | 7.569 | 121.04 | 4.304           | -     | -     | 1.398:HB*                                                                   |
| Thr13      | 7.764 | 110.34 | 4.585           | 61.74 | -     | 4.787:HB 1.439:HG2*                                                         |
| Pro14      | -     | -      | 4.266           | 67.55 | -     | 1.976:HB2 2.423:HB3 2.087:HG2 2.250:HG3 3.916:HD2<br>3.973:HD3              |
| Glu15      | 9.048 | 116.77 | 4.166           | 61.85 | -     | 1.977:HB2 2.133:HB3 2.343:HG2 2.399:HG3 38.61:CG                            |
| Lys16      | 7.919 | 120.78 | 4.183           | -     | -     | 1.844:HB2 2.052:HB3                                                         |
| Leu17      | 8.401 | 120.60 | 4.176           | -     | -     | 1.667:HB2 1.856:HB3 0.884:HD1* 0.907:HD2*                                   |
| Ala18      | 8.418 | 121.21 | 4.257           | -     | -     | 1.511:HB*                                                                   |
| Lys19      | 8.043 | 119.64 | 4.210           | -     | -     | 1.963:HB2 2.023:HB3                                                         |
| Phe20      | 7.998 | 117.94 | 4.298           | 61.36 | -     | 3.146:HB2 3.217:HB3 7.299:HD*                                               |
| Gln21      | 8.150 | 115.71 | 3.686           | 60.76 | -     | 2.156:HB2 2.202:HB3 2.617:HG2 2.617:HG3 7.086:HE21<br>7.746:HE22 110.91:NE2 |
| Ala22      | 7.983 | 122.05 | 4.224           | -     | -     | 1.549:HB*                                                                   |
| Asp23      | 9.083 | 120.80 | 4.430           | -     | -     | 2.483:HB2 2.833:HB3                                                         |
| Leu24      | 9.021 | 123.51 | 3.945           | -     | -     | 1.520:HB2 1.521:HB3 0.834:HD1* 0.942:HD2*                                   |
| Ala25      | 7.802 | 120.39 | 4.191           | -     | -     | 1.511:HB*                                                                   |
| Lys26      | 7.923 | 118.47 | 4.116           | -     | -     | 1.916:HB2 1.989:HB3 1.503:HG2 1.506:HG3                                     |
| Phe27      | 8.222 | 118.87 | 4.439           | -     | -     | 3.302:HB2 3.315:HB3 7.182:HD* 133.93:CD*                                    |
| Gln28      | 8.379 | 115.72 | 3.675           | 60.69 | -     | 2.050:HB2 2.184:HB3 2.566:HG2 2.685:HG3 7.011:HE21<br>7.540:HE22 109.47:NE2 |
| Lys29      | 7.725 | 120.39 | 4.104           | -     | -     | 1.900:HB2 2.026:HB3 1.491:HG2 1.494:HG3                                     |
| Asp30      | 8.825 | 119.43 | 4.339           | -     | -     | 2.541:HB2 2.724:HB3                                                         |
| Leu31      | 8.646 | 120.68 | 3.883           | 59.63 | -     | 1.449:HB2 1.449:HB3 0.813:HD1* 1.023:HD2*                                   |
| Ala32      | 7.649 | 121.18 | 4.116           | -     | -     | 1.499:HB*                                                                   |
| Asp33      | 8.191 | 116.42 | 4.437           | -     | -     | 2.654:HB2 2.654:HB3                                                         |
| Phe34      | 7.999 | 119.83 | 4.586           | -     | -     | 3.214:HB2 3.309:HB3 7.294:HD*                                               |

F PP $\alpha$ - $\phi$ F

| Residue    | H     | N      | HA              | CA    | CB    | Other                                                                                |
|------------|-------|--------|-----------------|-------|-------|--------------------------------------------------------------------------------------|
| Acetyl cap | -     | -      | -               | 26.04 | -     | 2.102:H*                                                                             |
| Pro1       | -     | -      | 3.554           | 62.57 | -     | 1.958:HB2 1.958:HB3 1.769:HG2 1.769:HG3 3.548:HD2<br>3.588:HD3                       |
| Pro2       | -     | -      | 4.535           | 64.73 | -     | 2.384:HB* 1.762:HG2 1.762:HG3 3.239:HD2 3.342:HD3                                    |
| Thr3       | 8.641 | 114.79 | 4.300           | 63.49 | 72.20 | 3.962:HB 1.159:HG2*                                                                  |
| Lys4       | 8.727 | 127.48 | 2.983           | 59.60 | -     | 1.281:HB2 1.470:HB3 0.795:HG2 1.282:HG3 1.592:HD2<br>1.592:HD3 2.946:HE2 2.946:HE3   |
| Pro5       | -     | -      | 4.497           | 64.64 | -     | 2.015:HB2 2.407:HB3 1.644:HG2 1.740:HG3 3.118:HD2<br>3.454:HD3                       |
| Thr6       | 8.593 | 116.44 | 4.109           | 61.09 | -     | 3.958:HB 1.198:HG2*                                                                  |
| Lys7       | 8.656 | 126.78 | 3.406           | 56.80 | -     | 1.492:HB2 1.572:HB3                                                                  |
| Pro8       | -     | -      | 4.374           | 64.76 | -     | 1.811:HB2 2.188:HB3 1.739:HG2 1.740:HG3 2.933:HD2<br>3.068:HD3                       |
| Gly9       | 8.377 | 106.67 | 3.897,<br>4.008 | 46.50 | -     |                                                                                      |
| Asp10      | 8.517 | 117.72 | 4.359           | -     | -     | 2.543:HB2 2.656:HB3                                                                  |
| Asn11      | 8.643 | 114.72 | 4.666           | 54.84 | 39.74 | 2.856:HB2 2.856:HB3 7.729:HD22 7.026:HD21 112.01:ND2                                 |
| Ala12      | 7.527 | 120.91 | 4.301           | 54.70 | -     | 1.393:HB*                                                                            |
| Thr13      | 7.744 | 110.22 | 4.579           | -     | -     | 4.800:HB 1.440:HG2* 24.61:CG2                                                        |
| Pro14      | -     | -      | 4.256           | 67.92 | -     | 1.975:HB2 2.427:HB3 2.090:HG2 2.253:HG3 3.916:HD2<br>3.978:HD3                       |
| Glu15      | 9.059 | 116.69 | 4.164           | 62.04 | -     | 1.974:HB2 2.134:HB3 2.336:HG2 2.398:HG3 38.71:CG                                     |
| Lys16      | 7.900 | 120.77 | 4.181           | -     | -     | 1.835:HB2 2.065:HB3                                                                  |
| Leu17      | 8.421 | 120.61 | 4.155           | -     | -     | 1.653:HB2 1.873:HB3 0.876:HD1* 0.893:HD2*                                            |
| Ala18      | 8.430 | 121.39 | 4.264           | -     | -     | 1.509:HB*                                                                            |
| Lys19      | 8.057 | 119.76 | 4.211           | -     | -     | 1.964:HB2 2.018:HB3                                                                  |
| $\phi$ F20 | 8.000 | 117.58 | 4.579           | 61.91 | -     | 3.208:HB2 3.282:HB3 7.331:HD* 6.962:HE* 135.91:CD*<br>120.44:CE*                     |
| Gln21      | 8.121 | 115.82 | 3.710           | 60.71 | -     | 2.170:HB2 2.212:HB3 2.606:HG2 2.606:HG3 7.086:HE21<br>7.767:HE22 35.80:CG 111.02:NE2 |
| Ala22      | 7.965 | 122.13 | 4.233           | -     | 19.95 | 1.552:HB*                                                                            |
| Asp23      | 9.115 | 120.76 | 4.426           | -     | -     | 2.472:HB2 2.815:HB3                                                                  |
| Leu24      | 9.018 | 123.45 | 3.938           | -     | -     | 1.416:HB2 1.574:HB3 0.832:HD1* 1.002:HD2*                                            |
| Ala25      | 7.803 | 120.51 | 4.203           | -     | -     | 1.512:HB*                                                                            |
| Lys26      | 7.932 | 118.65 | 4.121           | -     | -     | 1.927:HB2 1.994:HB3                                                                  |
| $\phi$ F27 | 8.203 | 118.50 | 4.455           | -     | -     | 3.281:HB2 3.336:HB3 7.202:HD* 7.036:HE* 135.89:CD*<br>120.37:CE*                     |
| Gln28      | 8.373 | 115.92 | 3.651           | 60.82 | -     | 2.052:HB2 2.189:HB3 2.564:HG2 2.663:HG3 7.012:HE21<br>7.562:HE22 109.52:NE2          |
| Lys29      | 7.677 | 120.38 | 4.103           | -     | -     | 1.889:HB2 2.036:HB3                                                                  |
| Asp30      | 8.681 | 120.51 | 3.860           | -     | -     | 2.550:HB2 2.723:HB3                                                                  |
| Leu31      | 8.681 | 120.51 | 3.860           | 59.76 | -     | 1.386:HB2 1.474:HB3 0.792:HD1* 1.046:HD2*                                            |
| Ala32      | 7.637 | 121.22 | 4.120           | -     | 19.90 | 1.498:HB*                                                                            |
| Asp33      | 8.218 | 116.38 | 4.436           | -     | 42.82 | 2.676:HB2 2.676:HB3                                                                  |
| $\phi$ F34 | 7.961 | 119.69 | 4.238           | -     | -     | 3.138:HB2 3.221:HB3 7.318:HD* 7.071:HE* 135.73:CD*<br>120.18:CE*                     |



## G PP $\alpha$ - $\phi$ CN

| Residue     | H     | N      | HA              | CA    | CB    | Other                                                                                |
|-------------|-------|--------|-----------------|-------|-------|--------------------------------------------------------------------------------------|
| Acetyl cap  | -     | -      | -               | 26.04 | -     | 2.141:H*                                                                             |
| Pro1        | -     | -      | 3.648           | 62.40 | -     | 1.818:HB2 1.818:HB3 1.967:HG2 2.027:HG3 3.623:HD2<br>3.624:HD3 53.19:CD              |
| Pro2        | -     | -      | 4.539           | 64.49 | -     | 2.018:HB2 2.389:HB3 1.757:HG2 1.757:HG3 3.241:HD2<br>3.278:HD3                       |
| Thr3        | 8.673 | 115.05 | 4.312           | 63.42 | 72.02 | 3.989:HB 1.181:HG2*                                                                  |
| Lys4        | 8.812 | 126.95 | 3.001           | 56.29 | -     | 1.272:HB2 1.544:HB3                                                                  |
| Pro5        | -     | -      | 4.503           | 64.41 | -     | 2.001:HB2 2.392:HB3 3.105:HD2 3.408:HD3                                              |
| Thr6        | 8.588 | 116.47 | 4.113           | 64.22 | 71.92 | 3.983:HB 1.208:HG2* 23.64:CG2                                                        |
| Lys7        | 8.757 | 126.14 | 3.430           | 56.97 | -     | 1.559:HB2 1.633:HB3                                                                  |
| Pro8        | -     | -      | 4.373           | 64.75 | -     | 1.815:HB2 2.167:HB3 1.389:HG2 1.705:HG3 2.928:HD2<br>3.427:HD3                       |
| Gly9        | 8.389 | 106.88 | 3.914,<br>3.994 | 46.24 | -     |                                                                                      |
| Asp10       | 8.515 | 117.84 | 4.366           | -     | -     | 2.560:HB2 2.655:HB3                                                                  |
| Asn11       | 8.651 | 115.06 | 4.671           | 54.66 | -     | 2.852:HB2 2.853:HB3 112.03:Nd 2.7026:HD21 7.728:HD22                                 |
| Ala12       | 7.531 | 120.98 | 4.306           | 54.48 | -     | 1.394:HB*                                                                            |
| Thr13       | 7.741 | 110.33 | 4.580           | 61.72 | 70.40 | 4.796:HB 1.445:HG2*                                                                  |
| Pro14       | -     | -      | 4.260           | 67.54 | -     | 1.976:HB2 2.428:HB3 2.090:HG2 2.252:HG3 3.917:HD2<br>3.982:HD3 52.29:CD              |
| Glu15       | 9.055 | 116.78 | 4.166           | 61.69 | -     | 1.978:HB2 2.137:HB3 2.344:HG2 2.397:HG3 38.50:CG                                     |
| Lys16       | 7.905 | 120.84 | 4.178           | -     | -     | 1.844:HB2 2.068:HB3                                                                  |
| Leu17       | 8.442 | 120.69 | 4.133           | -     | -     | 1.652:HB2 1.892:HB3 0.868:HD1* 0.895:HD2*                                            |
| Ala18       | 8.436 | 121.57 | 4.263           | -     | -     | 1.521:HB*                                                                            |
| Lys19       | 8.093 | 119.77 | 4.221           | -     | -     | 1.975:HB2 2.023:HB3                                                                  |
| $\phi$ CN20 | 8.091 | 117.11 | 4.633           | 62.57 | -     | 3.315:HB2 3.374:HB3 7.568:HD* 7.628:HE* 135.34:CD*<br>137.62:CE*                     |
| Gln21       | 8.159 | 116.30 | 3.753           | 60.62 | -     | 2.193:HB2 2.239:HB3 2.606:HG2 2.606:HG3 7.094:HE21<br>7.789:HE22 111.11:NE2          |
| Ala22       | 7.993 | 122.38 | 4.233           | -     | -     | 1.561:HB*                                                                            |
| Asp23       | 9.092 | 120.46 | 4.439           | -     | -     | 2.478:HB2 2.769:HB3                                                                  |
| Leu24       | 8.847 | 123.30 | 3.927           | 59.73 | -     | 1.424:HB2 1.609:HB3 0.868:HD1* 0.933:HD2*                                            |
| Ala25       | 7.856 | 120.87 | 4.212           | -     | -     | 1.521:HB*                                                                            |
| Lys26       | 7.973 | 118.67 | 4.129           | -     | -     | 1.934:HB2 1.990:HB3                                                                  |
| $\phi$ CN27 | 8.209 | 117.94 | 4.541           | 61.88 | -     | 3.380:HB2 3.444:HB3 7.421:HD* 7.716:HE* 134.91:CD*<br>137.38:CE*                     |
| Gln28       | 8.403 | 116.43 | 3.683           | 60.45 | -     | 2.066:HB2 2.205:HB3 2.550:HG2 2.646:HG3 7.012:HE21<br>7.596:HE22 35.77:CG 109.59:NE2 |
| Lys29       | 7.728 | 120.62 | 4.102           | -     | -     | 1.897:HB2 2.035:HB3                                                                  |
| Asp30       | 8.846 | 119.17 | 4.330           | -     | -     | 2.527:HB2 2.698:HB3                                                                  |
| Leu31       | 8.473 | 120.14 | 3.852           | 59.41 | -     | 1.388:HB2 1.494:HB3 0.805:HD1* 1.010:HD2*                                            |
| Ala32       | 7.651 | 121.27 | 4.117           | -     | -     | 1.498:HB*                                                                            |
| Asp33       | 8.247 | 116.40 | 4.437           | -     | 42.60 | 2.674:HB2 2.675:HB3                                                                  |
| $\phi$ CN34 | 8.023 | 119.10 | 4.350           | 60.54 | -     | 3.245:HB2 3.314:HB3 7.505:HD* 7.740:HE* 134.73:CD*<br>137.40:CE*                     |

**Supplementary Table 1: NMR structure calculation and validation statistics, and chemical shift assignments. A:** NMR structure calculation and validation statistics for PP $\alpha$ -Tyr, PP $\alpha$ - $\phi$ OCH $_3$  and PP $\alpha$ - $\phi$ CH $_3$ . **B-G:** NMR chemical shift assignments for **B:** PP $\alpha$ -Tyr, **C:** PP $\alpha$ - $\phi$ OCH $_3$ , **D:** PP $\alpha$ - $\phi$ CH $_3$ , **E:** PP $\alpha$ - $\phi$ Phe, **F:** PP $\alpha$ - $\phi$ F and **G:** PP $\alpha$ - $\phi$ CN. \* = equivalent nuclei. CM = methyl C.

A PP $\alpha$ -Tyr45 CH- $\pi$  interactions (2.25  $\pm$  0.91 per ensemble structure)

| Model | CH donor                                                  | CH acceptor                      |
|-------|-----------------------------------------------------------|----------------------------------|
| 1     | Pro1 CA-HA<br>Pro5 CG-HG2                                 | Tyr34<br>Tyr20                   |
| 2     | Pro1 CA-HA<br>Pro2 CG-HG2<br>Lys4 CG-HG2                  | Tyr34<br>Tyr27<br>Tyr27          |
| 3     | Lys4 CA-HA<br>Lys4 CG-HG2<br>Leu24 CB-HB2<br>Leu31 CB-HB2 | Tyr27<br>Tyr27<br>Tyr20<br>Tyr27 |
| 4     | Pro1 CA-HA<br>Pro5 CB-HB2<br>Pro5 CG-HG2                  | Tyr34<br>Tyr20<br>Tyr20          |
| 5     | Pro1 CA-HA<br>Pro8 CA-HA                                  | Tyr34<br>Tyr20                   |
| 6     | Pro1 CA-HA                                                | Tyr34                            |
| 7     | Pro2 CG-HG2<br>Lys4 CA-HA<br>Gly9 CA-HA2                  | Tyr27<br>Tyr27<br>Tyr20          |
| 8     | Lys4 CA-HA                                                | Tyr27                            |
| 9     | Pro2 CG-HG2<br>Lys4 CA-HA                                 | Tyr27<br>Tyr27                   |
| 10    | Pro1 CA-HA<br>Pro2 CG-HG2<br>Leu24 CB-HB2                 | Tyr34<br>Tyr27<br>Tyr20          |
| 11    | Pro2 CG-HG2<br>Lys4 CA-HA                                 | Tyr27<br>Tyr27                   |
| 12    | Pro1 CA-HA<br>Pro5 CG-HG2                                 | Tyr34<br>Tyr20                   |
| 13    | Lys4 CA-HA                                                | Tyr27                            |
| 14    | Pro1 CA-HA<br>Lys4 CA-HA<br>Gly9 CA-HA2<br>Leu31 CB-HB2   | Tyr34<br>Tyr27<br>Tyr20<br>Tyr27 |
| 15    | Pro1 CA-HA<br>Lys4 CA-HA<br>Lys4 CG-HG2                   | Tyr34<br>Tyr27<br>Tyr27          |
| 16    | Pro1 CA-HA<br>Lys4 CA-HA                                  | Tyr34<br>Tyr27                   |
| 17    | Pro1 CA-HA<br>Lys4 CA-HA                                  | Tyr34<br>Tyr27                   |
| 18    | Pro2 CB-HB2                                               | Tyr27                            |
| 19    | Pro1 CA-HA<br>Lys4 CG-HG2                                 | Tyr34<br>Tyr27                   |
| 20    | Pro1 CA-HA<br>Lys4 CG-HG2                                 | Tyr34<br>Tyr27                   |

Pro donor total = 24 i.e. 1.2 CH- $\pi$  interactions per structure.Leu donor total = 4 i.e. 0.2 CH- $\pi$  interactions per structure.Lys donor total = 15 i.e. 0.75 CH- $\pi$  interactions per structure.Gly donor total = 2 i.e. 0.1 CH- $\pi$  interactions per structure.

**B** PP $\alpha$ - $\phi$ OCH<sub>3</sub>54 CH- $\pi$  interactions ( $2.7 \pm 0.86$  per ensemble structure)

| Model | CH donor                                                     | CH acceptor                                                                                                      |
|-------|--------------------------------------------------------------|------------------------------------------------------------------------------------------------------------------|
| 1     | Pro1 CA-HA<br>Lys4 CA-HA<br>Leu24 CD2-HD23<br>Leu31 CB-HB2   | 4-OCH <sub>3</sub> -Phe34<br>4-OCH <sub>3</sub> -Phe27<br>4-OCH <sub>3</sub> -Phe20<br>4-OCH <sub>3</sub> -Phe27 |
| 2     | Lys4 CA-HA<br>Leu24 CD1-HD12                                 | 4-OCH <sub>3</sub> -Phe27<br>4-OCH <sub>3</sub> -Phe20                                                           |
| 3     | Pro1 CA-HA<br>Leu24 CG-HG<br>Leu24 CD1-HD11                  | 4-OCH <sub>3</sub> -Phe34<br>4-OCH <sub>3</sub> -Phe20<br>4-OCH <sub>3</sub> -Phe20                              |
| 4     | Pro1 CA-HA<br>Lys4 CA-HA<br>Leu31 CB-HB2<br>Leu31 CG-HG      | 4-OCH <sub>3</sub> -Phe34<br>4-OCH <sub>3</sub> -Phe27<br>4-OCH <sub>3</sub> -Phe27<br>4-OCH <sub>3</sub> -Phe27 |
| 5     | Pro1 CA-HA<br>Lys4 CA-HA<br>Leu24 CD1-HD13                   | 4-OCH <sub>3</sub> -Phe34<br>4-OCH <sub>3</sub> -Phe27<br>4-OCH <sub>3</sub> -Phe20                              |
| 6     | Pro1 CA-HA<br>Leu24 CD1-HD12                                 | 4-OCH <sub>3</sub> -Phe34<br>4-OCH <sub>3</sub> -Phe20                                                           |
| 7     | Pro1 CA-HA<br>Lys4 CA-HA<br>Leu31 CD2-HD22                   | 4-OCH <sub>3</sub> -Phe34<br>4-OCH <sub>3</sub> -Phe27<br>4-OCH <sub>3</sub> -Phe27                              |
| 8     | Pro1 CA-HA<br>Lys4 CA-HA<br>Leu24 CD1-HD12<br>Leu31 CD2-HD22 | 4-OCH <sub>3</sub> -Phe34<br>4-OCH <sub>3</sub> -Phe27<br>4-OCH <sub>3</sub> -Phe20<br>4-OCH <sub>3</sub> -Phe27 |
| 9     | Pro1 CA-HA<br>Lys4 CA-HA<br>Leu31 CB2-HB2                    | 4-OCH <sub>3</sub> -Phe34<br>4-OCH <sub>3</sub> -Phe27<br>4-OCH <sub>3</sub> -Phe27                              |
| 10    | Pro1 CA-HA<br>Lys4 CA-HA<br>Leu24 CD2-HD21                   | 4-OCH <sub>3</sub> -Phe34<br>4-OCH <sub>3</sub> -Phe27<br>4-OCH <sub>3</sub> -Phe20                              |
| 11    | Lys4 CA-HA                                                   | 4-OCH <sub>3</sub> -Phe27                                                                                        |
| 12    | Lys4 CA-HA<br>Leu31 CB-HB2                                   | 4-OCH <sub>3</sub> -Phe27<br>4-OCH <sub>3</sub> -Phe27                                                           |
| 13    | Lys4 CA-HA<br>Leu31 CB-HB2<br>Leu31 CG-HG                    | 4-OCH <sub>3</sub> -Phe27<br>4-OCH <sub>3</sub> -Phe27<br>4-OCH <sub>3</sub> -Phe27                              |
| 14    | Leu24 CD1-HD11                                               | 4-OCH <sub>3</sub> -Phe20                                                                                        |
| 15    | Lys4 CA-HA<br>Leu24 CD1-HD11<br>Leu31 CB-HB2                 | 4-OCH <sub>3</sub> -Phe27<br>4-OCH <sub>3</sub> -Phe20<br>4-OCH <sub>3</sub> -Phe27                              |
| 16    | Pro1 CA-HA<br>Lys4 CA-HA<br>Leu24 CD2-HD22                   | 4-OCH <sub>3</sub> -Phe34<br>4-OCH <sub>3</sub> -Phe27<br>4-OCH <sub>3</sub> -Phe20                              |
| 17    | Pro1 CA-HA<br>Leu24 CD2-HD23                                 | 4-OCH <sub>3</sub> -Phe34<br>4-OCH <sub>3</sub> -Phe20                                                           |
| 18    | Pro1 CA-HA<br>Lys4 CA-HA<br>Leu31 CB-HB2                     | 4-OCH <sub>3</sub> -Phe34<br>4-OCH <sub>3</sub> -Phe27<br>4-OCH <sub>3</sub> -Phe27                              |
| 19    | Pro1 CA-HA<br>Lys4 CA-HA                                     | 4-OCH <sub>3</sub> -Phe34<br>4-OCH <sub>3</sub> -Phe27                                                           |
| 20    | Lys4 CA-HA                                                   | 4-OCH <sub>3</sub> -Phe27                                                                                        |

|  |                             |                                                        |
|--|-----------------------------|--------------------------------------------------------|
|  | Leu31 CB-HB2<br>Leu31 CG-HG | 4-OCH <sub>3</sub> -Phe27<br>4-OCH <sub>3</sub> -Phe27 |
|--|-----------------------------|--------------------------------------------------------|

Pro donor total = 13 i.e. 0.65 CH- $\pi$  interactions per structure.

Leu donor total = 25 i.e. 1.25 CH- $\pi$  interactions per structure.

Lys donor total = 16 i.e. 0.8 CH- $\pi$  interactions per structure.

## C PP $\alpha$ - $\phi$ CH<sub>3</sub>

50 CH- $\pi$  interactions ( $2.5 \pm 0.76$  per ensemble structure)

| Model | CH donor                                                    | CH acceptor                                                                                                  |
|-------|-------------------------------------------------------------|--------------------------------------------------------------------------------------------------------------|
| 1     | Pro1 CA-HA<br>Leu24 CD2-HD21                                | 4-CH <sub>3</sub> -Phe34<br>4-CH <sub>3</sub> -Phe20                                                         |
| 2     | Lys4 CA-HA<br>Leu24 CD2-HD21                                | 4-CH <sub>3</sub> -Phe27<br>4-CH <sub>3</sub> -Phe20                                                         |
| 3     | Pro1 CA-HA<br>Lys4 CA-HA<br>Leu24 CD2-HD22                  | 4-CH <sub>3</sub> -Phe34<br>4-CH <sub>3</sub> -Phe27<br>4-CH <sub>3</sub> -Phe20                             |
| 4     | Lys4 CA-HA<br>Leu24 CD2-HD22                                | 4-CH <sub>3</sub> -Phe27<br>4-CH <sub>3</sub> -Phe20                                                         |
| 5     | Pro1 CA-HA<br>Lys4 CA-HA<br>Leu24 CD2-HD23<br>Leu31 CB2-HB2 | 4-CH <sub>3</sub> -Phe34<br>4-CH <sub>3</sub> -Phe27<br>4-CH <sub>3</sub> -Phe20<br>4-CH <sub>3</sub> -Phe27 |
| 6     | Leu24 CD2-HD22                                              | 4-CH <sub>3</sub> -Phe20                                                                                     |
| 7     | Lys4 CA-HA<br>Leu24 CD2-HD23                                | 4-CH <sub>3</sub> -Phe27<br>4-CH <sub>3</sub> -Phe20                                                         |
| 8     | Pro2 CD-HD2<br>Lys4 CA-HA<br>Leu24 CD2-HD23                 | 4-CH <sub>3</sub> -Phe34<br>4-CH <sub>3</sub> -Phe27<br>4-CH <sub>3</sub> -Phe20                             |
| 9     | Pro2 CD-HD2<br>Lys4 CA-HA<br>Leu24 CD2-HD21                 | 4-CH <sub>3</sub> -Phe34<br>4-CH <sub>3</sub> -Phe27<br>4-CH <sub>3</sub> -Phe20                             |
| 10    | Lys4 CA-HA<br>Leu24 CD2-HD21                                | 4-CH <sub>3</sub> -Phe27<br>4-CH <sub>3</sub> -Phe20                                                         |
| 11    | Lys4 CA-HA<br>Leu24 CG-HG                                   | 4-CH <sub>3</sub> -Phe27<br>4-CH <sub>3</sub> -Phe20                                                         |
| 12    | Lys4 CA-HA<br>Leu24 CD2-HD23                                | 4-CH <sub>3</sub> -Phe27<br>4-CH <sub>3</sub> -Phe20                                                         |
| 13    | Pro2 CD-HD2<br>Lys4 CA-HA<br>Leu24 CD2-HD22                 | 4-CH <sub>3</sub> -Phe34<br>4-CH <sub>3</sub> -Phe27<br>4-CH <sub>3</sub> -Phe20                             |
| 14    | Lys4 CA-HA<br>Leu24 CD2-HD22                                | 4-CH <sub>3</sub> -Phe27<br>4-CH <sub>3</sub> -Phe20                                                         |
| 15    | Pro2 CD-HD2<br>Leu24 CD2-HD23                               | 4-CH <sub>3</sub> -Phe34<br>4-CH <sub>3</sub> -Phe20                                                         |
| 16    | Pro1 CA-HA<br>Pro2 CD-HD2<br>Lys4 CA-HA<br>Leu24 CG-HG      | 4-CH <sub>3</sub> -Phe34<br>4-CH <sub>3</sub> -Phe34<br>4-CH <sub>3</sub> -Phe27<br>4-CH <sub>3</sub> -Phe20 |
| 17    | Lys4 CA-HA<br>Leu24 CD2-HD22                                | 4-CH <sub>3</sub> -Phe27<br>4-CH <sub>3</sub> -Phe20                                                         |
| 18    | Lys4 CA-HA                                                  | 4-CH <sub>3</sub> -Phe27                                                                                     |

|    |                                             |                                                                                  |
|----|---------------------------------------------|----------------------------------------------------------------------------------|
|    | Leu24 CD2-HD22<br>Leu32 CD2-HD23            | 4-CH <sub>3</sub> -Phe20<br>4-CH <sub>3</sub> -Phe27                             |
| 19 | Pro2 CD-HD2<br>Lys4 CA-HA<br>Leu24 CD2-HD23 | 4-CH <sub>3</sub> -Phe34<br>4-CH <sub>3</sub> -Phe27<br>4-CH <sub>3</sub> -Phe20 |
| 20 | Pro1 CA-HA<br>Lys4 CA-HA<br>Leu24 CD2-HD21  | 4-CH <sub>3</sub> -Phe34<br>4-CH <sub>3</sub> -Phe27<br>4-CH <sub>3</sub> -Phe20 |

Pro donor total = 11 i.e. 0.55 CH- $\pi$  interactions per structure.

Leu donor total = 22 i.e. 1.1 CH- $\pi$  interactions per structure.

Lys donor total = 17 i.e. 0.85 CH- $\pi$  interactions per structure.

**Supplementary Table 2: CH- $\pi$  interactions detected in the NMR structural ensembles of. A: PP $\alpha$ -Tyr, B: PP $\alpha$ - $\phi$ OCH<sub>3</sub> and C: PP $\alpha$ - $\phi$ CH<sub>3</sub>. Potential CH- $\pi$  interactions were assigned using an operational description adapted from previous studies.<sup>1,2</sup>**

| A   | Total | No. CH- $\pi$<br>as donor | Average<br>CH- $\pi$ | B Contacts with CH- $\pi$ |     |     |     | C Proportion with CH- $\pi$ |      |      |      | D Proportion x Propensity |      |      |      |
|-----|-------|---------------------------|----------------------|---------------------------|-----|-----|-----|-----------------------------|------|------|------|---------------------------|------|------|------|
|     |       |                           |                      | HIS                       | PHE | TRP | TYR | HIS                         | PHE  | TRP  | TYR  | HIS                       | PHE  | TRP  | TYR  |
| ALA | 664   | 39                        | 0.06                 | 3                         | 12  | 9   | 11  | 0.16                        | 0.14 | 0.24 | 0.14 | 0.13                      | 0.14 | 0.25 | 0.15 |
| ARG | 310   | 40                        | 0.13                 | 3                         | 10  | 10  | 7   | 0.14                        | 0.20 | 0.26 | 0.13 | 0.17                      | 0.15 | 0.36 | 0.12 |
| ASN | 346   | 11                        | 0.03                 | 0                         | 4   | 1   | 6   | 0.00                        | 0.18 | 0.08 | 0.16 | 0.00                      | 0.09 | 0.05 | 0.15 |
| ASP | 432   | 5                         | 0.01                 | 1                         | 4   | 0   | 0   | 0.03                        | 0.11 | 0.00 | 0.00 | 0.06                      | 0.07 | 0.00 | 0.00 |
| CYS | 162   | 21                        | 0.13                 | 1                         | 6   | 5   | 5   | 0.20                        | 0.17 | 0.71 | 0.24 | 0.13                      | 0.21 | 0.41 | 0.20 |
| GLN | 299   | 22                        | 0.07                 | 0                         | 5   | 8   | 6   | 0.00                        | 0.19 | 0.35 | 0.17 | 0.00                      | 0.10 | 0.40 | 0.15 |
| GLU | 355   | 11                        | 0.03                 | 3                         | 2   | 4   | 0   | 0.11                        | 0.05 | 0.21 | 0.00 | 0.20                      | 0.04 | 0.18 | 0.00 |
| GLY | 682   | 27                        | 0.04                 | 2                         | 8   | 11  | 6   | 0.17                        | 0.14 | 0.38 | 0.10 | 0.13                      | 0.15 | 0.48 | 0.13 |
| HIS | 140   | 13                        | 0.09                 | 1                         | 4   | 4   | 2   | 0.04                        | 0.17 | 0.36 | 0.07 | 0.13                      | 0.14 | 0.33 | 0.08 |
| ILE | 371   | 61                        | 0.16                 | 3                         | 20  | 10  | 18  | 0.14                        | 0.14 | 0.22 | 0.18 | 0.09                      | 0.16 | 0.19 | 0.16 |
| LEU | 575   | 105                       | 0.18                 | 10                        | 35  | 13  | 25  | 0.33                        | 0.16 | 0.19 | 0.16 | 0.19                      | 0.18 | 0.16 | 0.15 |
| LYS | 378   | 60                        | 0.16                 | 3                         | 15  | 11  | 13  | 0.20                        | 0.38 | 0.42 | 0.29 | 0.20                      | 0.27 | 0.48 | 0.28 |
| MET | 123   | 28                        | 0.23                 | 2                         | 12  | 5   | 5   | 0.22                        | 0.22 | 0.20 | 0.13 | 0.20                      | 0.33 | 0.32 | 0.16 |
| PHE | 283   | 71                        | 0.25                 | 7                         | 28  | 9   | 16  | 0.30                        | 0.19 | 0.18 | 0.16 | 0.25                      | 0.27 | 0.21 | 0.18 |
| PRO | 356   | 58                        | 0.16                 | 5                         | 13  | 10  | 19  | 0.26                        | 0.27 | 0.30 | 0.31 | 0.34                      | 0.25 | 0.45 | 0.42 |
| SER | 541   | 17                        | 0.03                 | 1                         | 4   | 6   | 3   | 0.04                        | 0.07 | 0.29 | 0.06 | 0.06                      | 0.06 | 0.22 | 0.05 |
| THR | 547   | 20                        | 0.04                 | 3                         | 9   | 3   | 3   | 0.09                        | 0.11 | 0.09 | 0.05 | 0.12                      | 0.10 | 0.08 | 0.04 |
| TRP | 102   | 29                        | 0.28                 | 3                         | 9   | 5   | 8   | 0.27                        | 0.18 | 0.25 | 0.19 | 0.25                      | 0.21 | 0.27 | 0.21 |
| TYR | 254   | 36                        | 0.14                 | 3                         | 14  | 4   | 11  | 0.11                        | 0.14 | 0.10 | 0.13 | 0.12                      | 0.16 | 0.11 | 0.14 |
| VAL | 500   | 67                        | 0.10                 | 2                         | 17  | 14  | 17  | 0.09                        | 0.11 | 0.22 | 0.15 | 0.05                      | 0.12 | 0.23 | 0.14 |

**Supplementary Table 3: Distribution of CH- $\pi$  interactions in our sub-1 Å dataset from the PDB.** **A:** Composition of dataset showing numbers of CH- $\pi$  donors, and average numbers of CH- $\pi$  interactions per donor residue. **B:** Numbers of close-contact side-chain – side-chain interactions that involve at least one CH- $\pi$  interaction (CH donor residues, vertical and aromatic  $\pi$ -acceptor residues, horizontal). **C:** Proportion of close contact side-chain – side-chain interactions that involve CH- $\pi$  interactions. **D:** Proportion of CH- $\pi$  interactions in C normalized for propensity (*i.e.*, multiplied by propensity) of the residues to be in close contact.

| Peptide                            | T <sub>M</sub> (°C)<br>from first<br>derivative | T <sub>M</sub> (°C)<br>from curve<br>fitting | ΔH <sub>unf</sub><br>(kJ mol <sup>-1</sup> ) | ΔS <sub>unf</sub><br>(kJ K <sup>-1</sup> mol <sup>-1</sup> ) | ΔG <sub>unf</sub><br>(kJ mol <sup>-1</sup> ) | ΔC <sub>p</sub><br>(kJ K <sup>-1</sup> mol <sup>-1</sup> ) |
|------------------------------------|-------------------------------------------------|----------------------------------------------|----------------------------------------------|--------------------------------------------------------------|----------------------------------------------|------------------------------------------------------------|
| PP <sub>α</sub> -Tyr               | 40                                              | 36.82                                        | 103.4                                        | 0.3457                                                       | 6.136                                        | -0.4598                                                    |
|                                    | 39                                              | 36.90                                        | 103.9                                        | 0.3476                                                       | 6.184                                        | -0.4612                                                    |
|                                    | 39                                              | 36.92                                        | 104.4                                        | 0.3484                                                       | 6.325                                        | -0.3856                                                    |
|                                    | 39                                              | 35.82                                        | 103.0                                        | 0.3466                                                       | 5.509                                        | -0.6224                                                    |
|                                    | <b>39.25</b><br><b>(0.5)</b>                    | <b>36.62</b><br><b>(0.5)</b>                 | <b>103.7</b><br><b>(0.59)</b>                | <b>0.3471</b><br><b>(0.0011)</b>                             | <b>6.039</b><br><b>(0.3617)</b>              | <b>-0.4822</b><br><b>(0.0999)</b>                          |
| PP <sub>α</sub> -φOCH <sub>3</sub> | 38                                              | 33.65                                        | 100.9                                        | 0.3415                                                       | 4.938                                        | -0.6221                                                    |
|                                    | 37                                              | 34.26                                        | 104.8                                        | 0.3516                                                       | 5.066                                        | -0.6882                                                    |
|                                    | 38                                              | 33.49                                        | 102.1                                        | 0.3458                                                       | 4.878                                        | -0.5832                                                    |
|                                    | <b>37.67</b><br><b>(0.58)</b>                   | <b>33.80</b><br><b>(0.4060)</b>              | <b>102.6</b><br><b>(1.969)</b>               | <b>0.3463</b><br><b>(0.0051)</b>                             | <b>4.960</b><br><b>(0.0962)</b>              | <b>-0.6312</b><br><b>(0.0531)</b>                          |
| PP <sub>α</sub> -φCH <sub>3</sub>  | 31                                              | 28.57                                        | 106.9                                        | 0.3622                                                       | 4.474                                        | -1.010                                                     |
|                                    | 31                                              | 28.90                                        | 105.7                                        | 0.3599                                                       | 4.772                                        | -0.6337                                                    |
|                                    | 32                                              | 28.81                                        | 105.9                                        | 0.3602                                                       | 4.680                                        | -0.6631                                                    |
|                                    | <b>31.33</b><br><b>(0.58)</b>                   | <b>28.76</b><br><b>(0.1709)</b>              | <b>106.2</b><br><b>(0.6509)</b>              | <b>0.3608</b><br><b>(0.0013)</b>                             | <b>4.642</b><br><b>(0.1525)</b>              | <b>-0.7688</b><br><b>(0.2091)</b>                          |
| PP <sub>α</sub> -Phe               | 20                                              | 17.20                                        | 107.5                                        | 0.3765                                                       | 2.383                                        | -0.9764                                                    |
|                                    | 20                                              | 17.73                                        | 108.4                                        | 0.3781                                                       | 2.621                                        | -0.8855                                                    |
|                                    | 20                                              | 17.63                                        | 106.6                                        | 0.3732                                                       | 2.514                                        | -0.9329                                                    |
|                                    | 20                                              | 17.56                                        | 107.5                                        | 0.3757                                                       | 2.439                                        | -1.037                                                     |
|                                    | <b>20</b><br><b>(0.0)</b>                       | <b>17.53</b><br><b>(0.2298)</b>              | <b>107.5</b><br><b>(0.7034)</b>              | <b>0.3759</b><br><b>(0.0021)</b>                             | <b>2.489</b><br><b>(0.1029)</b>              | <b>-0.9580</b><br><b>(0.0645)</b>                          |
| PP <sub>α</sub> -F                 | 26                                              | 23.85                                        | 105.6                                        | 0.3638                                                       | 3.763                                        | -0.6980                                                    |
|                                    | 26                                              | 23.73                                        | 106.1                                        | 0.3652                                                       | 3.935                                        | -0.6536                                                    |
|                                    | 26                                              | 23.89                                        | 106.9                                        | 0.3678                                                       | 3.921                                        | -0.7440                                                    |
|                                    | <b>26</b><br><b>(0.0)</b>                       | <b>23.82</b><br><b>(0.0792)</b>              | <b>106.2</b><br><b>(0.6635)</b>              | <b>0.3656</b><br><b>(0.0020)</b>                             | <b>3.873</b><br><b>(0.0952)</b>              | <b>-0.6986</b><br><b>(0.0452)</b>                          |
| PP <sub>α</sub> -CN                | 22                                              | 21.36                                        | 109.0                                        | 0.3746                                                       | 3.371                                        | -0.8708                                                    |
|                                    | 22                                              | 21.06                                        | 107.1                                        | 0.3697                                                       | 3.200                                        | -0.7332                                                    |
|                                    | 23                                              | 21.47                                        | 106.5                                        | 0.3681                                                       | 3.198                                        | -0.7161                                                    |
|                                    | <b>22.33</b><br><b>(0.58)</b>                   | <b>21.30</b><br><b>(0.2076)</b>              | <b>107.5</b><br><b>(1.311)</b>               | <b>0.3708</b><br><b>(0.0034)</b>                             | <b>3.257</b><br><b>(0.0996)</b>              | <b>-0.7733</b><br><b>(0.0848)</b>                          |
| PP <sub>α</sub> -NO <sub>2</sub>   | 17                                              | 17.12                                        | 114.1                                        | 0.3922                                                       | 2.632                                        | -0.8275                                                    |
|                                    | 18                                              | 17.34                                        | 114.9                                        | 0.3944                                                       | 2.709                                        | -0.7264                                                    |
|                                    | 17                                              | 17.17                                        | 113.9                                        | 0.3912                                                       | 2.651                                        | -0.8894                                                    |
|                                    | <b>17.33</b><br><b>(0.58)</b>                   | <b>17.21</b><br><b>(0.1169)</b>              | <b>114.3</b><br><b>(0.5401)</b>              | <b>0.3926</b><br><b>(0.0016)</b>                             | <b>2.664</b><br><b>(0.0402)</b>              | <b>-0.8144</b><br><b>(0.0823)</b>                          |

**Supplementary Table 4: Van't Hoff analyses of PP<sub>α</sub> miniproteins.** Thermodynamic parameters of unfolding were obtained by curve fitting of the thermal denaturation profiles (see Materials and Methods). Averages are given in bold typeface and standard deviations in parenthesis. The values for ΔH<sub>unf</sub>, ΔS<sub>unf</sub>, ΔG<sub>unf</sub> are stated for 5°C where all of the peptides are close to fully folded.

## A

| Domain            | PDB ID | Expt. | Resolution (Å) | Domain Chain | Length (residues) | Bound Chain | Length (residues) | No. of CH- $\pi$ | Length of longest contiguous polyproline II helix (residues) |
|-------------------|--------|-------|----------------|--------------|-------------------|-------------|-------------------|------------------|--------------------------------------------------------------|
| SH3               | 1CKA   | XRAY  | 1.50           | A            | 57                | B           | 10                | 4                | 5                                                            |
| EVH1              | 1DDV   | XRAY  | 1.90           | A            | 111               | B           | 6                 | 5                | 3                                                            |
| WW                | 1EG4   | XRAY  | 2.00           | A            | 261               | P           | 15                | 4                | 5                                                            |
| EVH1              | 1EVH   | XRAY  | 1.80           | A            | 112               | B           | 7                 | 3                | 3                                                            |
| SH3               | 1GBQ   | NMR   | NA             | A            | 74                | B           | 12                | 1                | 3                                                            |
| WW                | 1K9Q   | NMR   | NA             | A            | 40                | B           | 6                 | 1                | 3                                                            |
| SH3               | 1OV3   | XRAY  | 1.80           | A            | 138               | C           | 18                | 7                | 4                                                            |
| WW                | 1PIN   | XRAY  | 1.35           | A            | 163               | B           | 155               | 0                | 3                                                            |
| SH3               | 1SEM   | XRAY  | 2.00           | A            | 58                | C           | 10                | 1                | 3                                                            |
| SH3               | 1SSH   | XRAY  | 1.40           | A            | 60                | B           | 12                | 4                | 8                                                            |
| SH3               | 1UTI   | XRAY  | 1.50           | A            | 58                | D           | 16                | 3                | 6                                                            |
| SH3               | 1W70   | XRAY  | 1.46           | B            | 60                | D           | 14                | 2                | 6                                                            |
| WW                | 1YWI   | NMR   | NA             | A            | 41                | B           | 10                | 6                | 4                                                            |
| SH3               | 1YWO   | XRAY  | 1.81           | A            | 64                | P           | 10                | 3                | 8                                                            |
| SH3               | 1ZUK   | XRAY  | 1.90           | A            | 68                | C           | 11                | 3                | 8                                                            |
| SH3               | 2DRM   | XRAY  | 1.35           | A            | 58                | E           | 18                | 2                | 4                                                            |
| SH3               | 2J06   | XRAY  | 1.80           | A            | 65                | B           | 60                | 0                | 3                                                            |
| Profilin          | 2JKG   | XRAY  | 1.89           | A            | 179               | P           | 8                 | 7                | 6                                                            |
| SH3               | 2K79   | NMR   | NA             | A            | 63                | B           | 110               | 0                | 3                                                            |
| SH3               | 2KNB   | NMR   | NA             | B            | 71                | A           | 81                | 3                | 3                                                            |
| WW                | 2KQ0   | NMR   | NA             | A            | 49                | B           | 12                | 1                | 3                                                            |
| SH3               | 2LZ6   | NMR   | NA             | B            | 64                | A           | 76                | 0                | 3                                                            |
| WW                | 2MPT   | NMR   | NA             | A            | 48                | B           | 14                | 2                | 6                                                            |
| Profilin          | 2PBD   | XRAY  | 1.50           | P            | 139               | V           | 10                | 8                | 8                                                            |
| SH3               | 2ROL   | NMR   | NA             | A            | 64                | B           | 12                | 0                | 3                                                            |
| SH3               | 2V1R   | XRAY  | 2.10           | B            | 80                | P           | 15                | 0                | 4                                                            |
| Profilin          | 2V8F   | XRAY  | 1.10           | A            | 140               | C           | 21                | 9                | 7                                                            |
| SH3               | 2VKN   | XRAY  | 2.05           | A            | 70                | C           | 12                | 2                | 6                                                            |
| SH3               | 2VWF   | XRAY  | 1.58           | A            | 58                | B           | 15                | 5                | 4                                                            |
| SH3               | 3THK   | XRAY  | 1.70           | B            | 73                | D           | 10                | 2                | 3                                                            |
| SH3               | 3UA7   | XRAY  | 1.50           | A            | 64                | E           | 12                | 2                | 6                                                            |
| SH3               | 4CC7   | XRAY  | 1.97           | M            | 67                | N           | 12                | 7                | 5                                                            |
| WW                | 4E5R   | XRAY  | 1.90           | A            | 56                | B           | 56                | 1                | 4                                                            |
| SH3               | 4HVW   | XRAY  | 0.98           | A            | 61                | B           | 13                | 3                | 5                                                            |
| SH3               | 4J9C   | XRAY  | 1.05           | A            | 63                | B           | 11                | 9                | 6                                                            |
| SH3               | 4LN2   | XRAY  | 1.00           | A            | 68                | B           | 11                | 4                | 7                                                            |
| WW                | 4ROF   | XRAY  | 2.03           | A            | 47                | C           | 14                | 4                | 3                                                            |
| SH3               | 4U5W   | XRAY  | 1.86           | B            | 180               | A           | 149               | 3                | 3                                                            |
| Total             |        |       |                |              |                   |             |                   | 129              | 177                                                          |
| Av. per structure |        |       |                |              |                   |             |                   | 3.39             | 4.66                                                         |
| Stdev             |        |       |                |              |                   |             |                   | 2.64             | 1.72                                                         |



## B

|     | Total within 4 Å of bound polypeptide | No. CH- $\pi$ as donor | Average CH- $\pi$ |
|-----|---------------------------------------|------------------------|-------------------|
| ALA | 25                                    | 4                      | 0.16              |
| ARG | 35                                    | 8                      | 0.23              |
| ASN | 6                                     | 0                      | 0.00              |
| ASP | 5                                     | 0                      | 0.00              |
| CYS | 1                                     | 0                      | 0.00              |
| GLN | 10                                    | 0                      | 0.00              |
| GLU | 12                                    | 0                      | 0.00              |
| GLY | 17                                    | 0                      | 0.00              |
| HIS | 7                                     | 0                      | 0.00              |
| ILE | 13                                    | 3                      | 0.23              |
| LEU | 32                                    | 13                     | 0.41              |
| LYS | 20                                    | 8                      | 0.40              |
| MET | 4                                     | 1                      | 0.25              |
| PHE | 9                                     | 1                      | 0.11              |
| PRO | 149                                   | 82                     | 0.55              |
| SER | 12                                    | 0                      | 0.00              |
| THR | 11                                    | 0                      | 0.00              |
| TRP | 6                                     | 0                      | 0.00              |
| TYR | 12                                    | 0                      | 0.00              |
| VAL | 21                                    | 1                      | 0.10              |

## C

| Component   | Donor   |     |      | Acceptor  |         |               |
|-------------|---------|-----|------|-----------|---------|---------------|
|             | Residue | C   | H    | Component | Residue | $\pi$ -System |
| <b>1CKA</b> |         |     |      |           |         |               |
| PRO         | 2       | CA  | HA   | PHE       | 141     | PHE           |
| PRO         | 3       | CD  | HD3  | PHE       | 141     | PHE           |
| LYS         | 8       | CG  | HG2  | TRP       | 169     | TRPA          |
| LYS         | 8       | CE  | HE3  | TRP       | 169     | TRPB          |
| <b>1EG4</b> |         |     |      |           |         |               |
| PRO         | 9       | CB  | HB3  | TRP       | 83      | TRPA          |
| PRO         | 9       | CB  | HB3  | TRP       | 83      | TRPB          |
| PRO         | 9       | CA  | HA   | TRP       | 83      | TRPB          |
| PRO         | 10      | CD  | HD2  | TYR       | 72      | TYR           |
| <b>1GBQ</b> |         |     |      |           |         |               |
| PRO         | 2       | CA  | HA   | TYR       | 7       | TYR           |
| <b>1UTI</b> |         |     |      |           |         |               |
| PRO         | 7       | CG  | HG2  | TRP       | 36      | TRPA          |
| LYS         | 12      | CG  | HG2  | TRP       | 36      | TRPA          |
| LYS         | 12      | CD  | HD3  | TRP       | 36      | TRPB          |
| <b>1W70</b> |         |     |      |           |         |               |
| PRO         | 363     | CD  | HD3  | PHE       | 179     | PHE           |
| PRO         | 369     | CD  | HD3  | TRP       | 207     | TRPA          |
| <b>1YWI</b> |         |     |      |           |         |               |
| PRO         | 6       | CB  | HB3  | TYR       | 30      | TYR           |
| LEU         | 8       | CD1 | HD12 | TYR       | 28      | TYR           |
| LEU         | 8       | CA  | HA   | TYR       | 28      | TYR           |
| LEU         | 8       | CD1 | HD13 | TRP       | 39      | TRPB          |
| PRO         | 9       | CG  | HG2  | TRP       | 39      | TRPA          |
| PRO         | 9       | CD  | HD2  | TRP       | 39      | TRPB          |
| <b>1YWO</b> |         |     |      |           |         |               |
| PRO         | 2       | CA  | HA   | PHE       | 11      | PHE           |
| PRO         | 3       | CD  | HD3  | PHE       | 11      | PHE           |

|             |     |     |      |     |      |      |
|-------------|-----|-----|------|-----|------|------|
| ARG         | 8   | CD  | HD2  | TRP | 39   | TRPB |
| <b>2K79</b> |     |     |      |     |      |      |
| <b>2MPT</b> |     |     |      |     |      |      |
| LEU         | 926 | CB  | HB3  | TRP | 505  | TRPA |
| LEU         | 928 | CD2 | HD22 | TRP | 505  | TRPA |
| <b>2LZ6</b> |     |     |      |     |      |      |
| <b>2VKN</b> |     |     |      |     |      |      |
| LEU         | 5   | CD2 | HD23 | TRP | 40   | TRPA |
| PRO         | 9   | CD  | HD2  | TYR | 11   | TYR  |
| <b>4ROF</b> |     |     |      |     |      |      |
| PRO         | 331 | CD  | HD3  | TRP | 466  | TRPA |
| PRO         | 331 | CB  | HB3  | TRP | 466  | TRPB |
| PRO         | 331 | CA  | HA   | TRP | 466  | TRPB |
| PRO         | 332 | CD  | HD2  | TYR | 455  | TYR  |
| <b>4CC7</b> |     |     |      |     |      |      |
| PRO         | 2   | CA  | HA   | TYR | 1522 | TYR  |
| PRO         | 3   | CD  | HD2  | TYR | 1570 | TYR  |
| PRO         | 3   | CD  | HD3  | TYR | 1522 | TYR  |
| PRO         | 6   | CG  | HG2  | TRP | 1554 | TRPA |
| PRO         | 6   | CG  | HG2  | TRP | 1554 | TRPB |
| PRO         | 10  | CB  | HB3  | TRP | 1554 | TRPA |
| PRO         | 10  | CD  | HD3  | TRP | 1554 | TRPB |
| <b>4U5W</b> |     |     |      |     |      |      |
| PRO         | 76  | CD  | HD2  | TYR | 136  | TYR  |
| PRO         | 76  | CD  | HD3  | TYR | 90   | TYR  |
| ARG         | 81  | CD  | HD3  | TRP | 118  | TRPA |
| <b>2V1R</b> |     |     |      |     |      |      |
| <b>2PBD</b> |     |     |      |     |      |      |
| PRO         | 203 | CB  | HB3  | TRP | 31   | TRPA |
| PRO         | 204 | CD  | HD2  | TRP | 31   | TRPB |
| ALA         | 206 | CB  | HB2  | TRP | 3    | TRPA |
| ALA         | 206 | CB  | HB2  | TRP | 3    | TRPB |
| PRO         | 207 | CD  | HD3  | TYR | 139  | TYR  |
| LEU         | 209 | CD2 | HD23 | TYR | 6    | TYR  |
| PRO         | 210 | CG  | HG3  | HIS | 133  | HIS  |
| PRO         | 210 | CD  | HD3  | HIS | 133  | HIS  |
| <b>1ZUK</b> |     |     |      |     |      |      |
| PRO         | 5   | CA  | HA   | PHE | 14   | PHE  |
| PRO         | 6   | CD  | HD2  | PHE | 63   | PHE  |
| ARG         | 11  | CD  | HD2  | TYR | 20   | TYR  |
| <b>2JKG</b> |     |     |      |     |      |      |
| PRO         | 1   | CB  | HB3  | TYR | 35   | TYR  |
| PRO         | 4   | CB  | HB3  | TRP | 7    | TRPA |
| PRO         | 4   | CA  | HA   | TRP | 7    | TRPB |
| PRO         | 5   | CD  | HD2  | TYR | 10   | TYR  |
| PRO         | 5   | CG  | HG2  | TYR | 10   | TYR  |
| PRO         | 5   | CD  | HD3  | TRP | 7    | TRPB |
| PRO         | 7   | CG  | HG3  | TYR | 5    | TYR  |
| <b>3THK</b> |     |     |      |     |      |      |
| PRO         | 74  | CA  | HA   | TYR | 12   | TYR  |
| PRO         | 75  | CD  | HD2  | TYR | 12   | TYR  |
| <b>2KQ0</b> |     |     |      |     |      |      |
| PRO         | 115 | CG  | HG2  | PHE | 28   | PHE  |
| <b>1K9Q</b> |     |     |      |     |      |      |
| PRO         | 5   | CG  | HG3  | TYR | 28   | TYR  |
| <b>2J06</b> |     |     |      |     |      |      |
| <b>1OV3</b> |     |     |      |     |      |      |
| PRO         | 151 | CA  | HA   | TRP | 204  | TRPA |
| PRO         | 151 | CB  | HB3  | TRP | 204  | TRPB |
| PRO         | 151 | CA  | HA   | TRP | 204  | TRPB |
| PRO         | 152 | CD  | HD3  | TRP | 204  | TRPA |

|             |      |     |      |     |     |      |
|-------------|------|-----|------|-----|-----|------|
| ARG         | 158  | CD  | HD2  | TRP | 263 | TRPA |
| ARG         | 158  | CD  | HD2  | TRP | 263 | TRPB |
| PRO         | 160  | CG  | HG3  | PHE | 209 | PHE  |
| <b>1EVH</b> |      |     |      |     |     |      |
| PRO         | 1002 | CG  | HG3  | TYR | 16  | TYR  |
| PRO         | 1002 | CB  | HB2  | TYR | 16  | TYR  |
| PRO         | 1005 | CD  | HD3  | PHE | 77  | PHE  |
| <b>4LN2</b> |      |     |      |     |     |      |
| PRO         | 860  | CD  | HD2  | TYR | 922 | TYR  |
| PRO         | 860  | CD  | HD3  | PHE | 876 | PHE  |
| LEU         | 865  | CD2 | HD23 | TRP | 904 | TRPB |
| PRO         | 866  | CD  | HD3  | TRP | 904 | TRPA |
| <b>1PIN</b> |      |     |      |     |     |      |
| <b>1SSH</b> |      |     |      |     |     |      |
| PRO         | 5    | CD  | HD3  | TYR | 10  | TYR  |
| MET         | 7    | CE  | HE2  | TYR | 56  | TYR  |
| ARG         | 10   | CA  | HA   | TRP | 40  | TRPA |
| ARG         | 10   | CG  | HG2  | TRP | 40  | TRPB |
| <b>4J9C</b> |      |     |      |     |     |      |
| ALA         | 1    | CA  | HA   | TRP | 110 | TRPA |
| ALA         | 1    | CB  | HB3  | TRP | 110 | TRPB |
| PRO         | 2    | CD  | HD2  | TRP | 99  | TRPA |
| PRO         | 2    | CD  | HD2  | TRP | 99  | TRPB |
| PRO         | 2    | CG  | HG2  | TRP | 99  | TRPB |
| PRO         | 6    | CD  | HD3  | TRP | 99  | TRPA |
| PRO         | 6    | CB  | HB3  | TRP | 99  | TRPB |
| PRO         | 10   | CD  | HD2  | TYR | 70  | TYR  |
| PRO         | 10   | CG  | HG2  | TYR | 70  | TYR  |
| <b>2ROL</b> |      |     |      |     |     |      |
| <b>2V8F</b> |      |     |      |     |     |      |
| ILE         | 1    | CG2 | HG21 | TRP | 31  | TRPA |
| ILE         | 1    | CB  | HB   | TRP | 31  | TRPB |
| PRO         | 2    | CD  | HD2  | TRP | 31  | TRPB |
| PRO         | 4    | CD  | HD3  | TRP | 3   | TRPA |
| PRO         | 4    | CB  | HB3  | TRP | 3   | TRPB |
| PRO         | 5    | CD  | HD3  | PHE | 139 | PHE  |
| LEU         | 7    | CG  | HG   | TYR | 6   | TYR  |
| LEU         | 7    | CD2 | HD21 | TYR | 6   | TYR  |
| LEU         | 7    | CD1 | HD11 | TYR | 6   | TYR  |
| <b>4E5R</b> |      |     |      |     |     |      |
| VAL         | 329  | CB  | HB   | TYR | 335 | TYR  |
| <b>2KNB</b> |      |     |      |     |     |      |
| ILE         | 44   | CG2 | HG21 | TYR | 299 | TYR  |
| PRO         | 73   | CG  | HG2  | TRP | 327 | TRPB |
| ARG         | 75   | CD  | HD2  | PHE | 338 | PHE  |
| <b>1SEM</b> |      |     |      |     |     |      |
| PRO         | 2    | CA  | HA   | PHE | 163 | PHE  |
| <b>4HVW</b> |      |     |      |     |     |      |
| LEU         | 3    | CB  | HB2  | TYR | 131 | TYR  |
| LEU         | 11   | CD2 | HD23 | TYR | 136 | TYR  |
| PRO         | 12   | CD  | HD2  | TYR | 90  | TYR  |
| <b>3UA7</b> |      |     |      |     |     |      |
| PRO         | 6    | CB  | HB3  | TYR | 91  | TYR  |
| PRO         | 7    | CD  | HD2  | TYR | 91  | TYR  |
| <b>2DRM</b> |      |     |      |     |     |      |
| LYS         | 3    | CA  | HA   | TYR | 11  | TYR  |
| PRO         | 4    | CD  | HD2  | TYR | 11  | TYR  |
| <b>2VWF</b> |      |     |      |     |     |      |
| PRO         | 3    | CA  | HA   | PHE | 7   | PHE  |
| PRO         | 4    | CD  | HD2  | TYR | 51  | TYR  |
| LYS         | 11   | CA  | HA   | TRP | 35  | TRPA |

|             |      |    |     |     |    |      |
|-------------|------|----|-----|-----|----|------|
| LYS         | 11   | CG | HG2 | TRP | 35 | TRPA |
| LYS         | 11   | CG | HG2 | TRP | 35 | TRPB |
| <b>1DDV</b> |      |    |     |     |    |      |
| PRO         | 1002 | CB | HB3 | PHE | 74 | PHE  |
| PRO         | 1003 | CD | HD3 | TRP | 24 | TRPA |
| PRO         | 1003 | CG | HG2 | PHE | 14 | PHE  |
| PRO         | 1003 | CD | HD2 | PHE | 74 | PHE  |
| PHE         | 1006 | CZ | HZ  | HIS | 12 | HIS  |

**Supplementary Table 5: Structural data and CH- $\pi$  interactions in binding of SH3, WW, Profilin and EVH1 domains from the PDB. A:** Identities of binding domain and bound polypeptide in the dataset. **B:** Total number of CH- $\pi$  interactions, and average number of CH- $\pi$  interactions per residue within 4 Å of the bound polypeptide chain. **C:** Identities of CH- $\pi$  donors and acceptors between domain and bound polypeptide.

- 1 Brandl, M., Weiss, M.S., Jabs, A., Sühnel, J. & Hilgenfeld, R. C-H $\cdots$  $\pi$ -Interactions in Proteins. *J. Mol. Biol.* **307**, 357-377 (2001).
- 2 Hudson, K.L. et al. Carbohydrate-Aromatic Interactions in Proteins. *J. Am. Chem. Soc.* **137**, 15152-15160 (2015).
